# Supplementary material for: Preparation of highly substituted (β-acylamino)acrylates via iron-catalyzed alkoxycarbonylation of N-vinylacetamides with carbazates
Source: Royal Society of Chemistry journal article supplement (doi:10.1039/c4cc05338a), 2014-01-01

---

**Preparation of Highly Substituted ( $\beta$ -Acylamino)acrylates via  
Iron-catalyzed Alkoxy carbonylation of *N*-Vinylacetamides with  
Carbazates**

Ran Ding,<sup>a</sup> Qiu-Chi Zhang,<sup>a</sup> Yun-He Xu,<sup>a\*</sup> and Teck-Peng Loh<sup>a,b\*</sup>

<sup>a</sup>*Hefei National Laboratory for Physical Science at the Microscale, Department of Chemistry, University of Sciences and Technology of China, Hefei, Anhui 230026, P.R. China.*

<sup>b</sup>*Division of Chemistry and Biological Chemistry, School of Physical and Mathematical Sciences, Nanyang Technological University, Singapore 637371.*

**Supporting Information**

**Table of Contents**

|                                                                  |    |
|------------------------------------------------------------------|----|
| 1. General information .....                                     | 2  |
| 2. Typical procedure for the synthesis of compound 3a - 3r. .... | 2  |
| 3. Typical procedure for the synthesis of compound 4a – 4l.....  | 2  |
| 4. Procedure for the gram-scale synthesis of compound 3a .....   | 3  |
| 5. Characterization data for the products .....                  | 3  |
| 5. References .....                                              | 15 |
| 6. NMR spectra for the products.....                             | 16 |

## 1. General information

Unless otherwise noted, all reagents and solvents were purchased from commercial suppliers and used without further purification.  $^1\text{H}$ -NMR and  $^{13}\text{C}$ -NMR spectra were recorded at 25 °C on Bruker Advance 400M NMR spectrometers ( $\text{CDCl}_3$  as solvent). Chemical shifts for  $^1\text{H}$  NMR spectra are reported as  $\delta$  in units of parts per million (ppm) downfield from  $\text{SiMe}_4$  ( $\delta$  0.0) and relative to the signal of  $\text{SiMe}_4$  ( $\delta$  0.00 singlet). Multiplicities were given as: s (singlet); d (doublet); t (triplet); q (quartet); dd (doublet of doublets); dt (doublet of triplets); m (multiplets) and etc. Coupling constants are reported as a  $J$  value in Hz.  $^{13}\text{C}$  NMR spectra are reported as  $\delta$  in units of parts per million (ppm) downfield from  $\text{SiMe}_4$  ( $\delta$  0.0) and relative to the signal of chloroform- $d$  ( $\delta$  77.00 triplet). High resolution mass spectral analysis (HRMS) was performed on Waters-XEVOG2 Q-TOF (Waters Corporation). IR spectra were recorded on a commercial FT/IR spectrometer. Flash chromatography was performed using 200-300 mesh silica gel with the indicated solvent system.

## 2. Procedure for the synthesis of compound 3a - 3r.

To a stirred solution of **1** (0.3 mmol), **2** (0.6 mmol),  $\text{Cs}_2\text{CO}_3$  (0.3 mmol) and  $[\text{Fe}(\text{Pc})]$  (0.03 mmol) in MeCN (1.5 mL) was added TBHP (120  $\mu\text{L}$ , 5-6 M in decane) slowly under an air atmosphere at room temperature. The mixture was heated at 60 °C for 2 h and then cooled to room temperature. The excess solvent was removed under vacuum, then the residue was directly purified by silica gel column chromatography (petroleum/ethyl acetate = 4:1) to give the desired product. The stereoselectivity (E/Z) was determined from the  $^1\text{H}$  NMR spectra recorded for the crude products.

## 3. Procedure for the synthesis of compound 4a – 4l.

To a stirred solution of **1** (0.3 mmol), **2** (0.6 mmol),  $\text{K}_2\text{CO}_3$  (0.3 mmol) and  $[\text{Fe}(\text{Pc})]$  (0.03 mmol) in MeCN (1.5 mL) was added TBHP (120  $\mu\text{L}$ , 5-6 M in decane) slowly under an air atmosphere at room temperature. The mixture was continued to react at

room temperature for 1 h. The excess solvent was removed under vacuum, and the residue was directly purified by silica gel column chromatography (petroleum/ethyl acetate = 4:1) to afford the desired product.

#### 4. Procedure for the gram-scale synthesis of compound **3a**.

To a stirred solution of **1a** (1g, 6.2 mmol), **2a** (1.12g, 12.4 mmol), Cs<sub>2</sub>CO<sub>3</sub> (2.02g, 0.3 mmol) and [Fe(Pc)] (0.35g, 0.62 mmol) in MeCN (30 mL) was added TBHP (2.48mL, 5-6 M in decane) slowly under an air atmosphere at room temperature. The mixture was heated at 60 °C for 2 h and then cooled to room temperature. The excess solvent was removed under vacuum, then the residue was directly purified by silica gel column chromatography (petroleum/ethyl acetate = 4:1) to give the desired product **3a** in 61% yield, 0.83g. The stereoselectivity (E/Z) was determined by the <sup>1</sup>H NMR spectra recorded for the crude product.

#### 5. Characterization data for the products

##### (Z)-methyl 3-acetamido-3-phenylacrylate (**3a**)

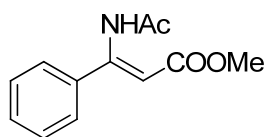

**3a**<sup>[2]</sup> was obtained as white solid. <sup>1</sup>H NMR (400 MHz, CDCl<sub>3</sub>) δ 10.61 (s, 1H), 7.40 – 7.35 (m, 5H), 5.29 (s, 1H), 3.77 (s, 3H), 2.17 (s, 3H). <sup>13</sup>C NMR (101 MHz, CDCl<sub>3</sub>) δ = 169.12, 168.51, 154.86, 135.97, 129.75, 128.18, 127.19, 100.67, 51.53, 24.92 ppm. HRMS (ESI): m/z calculated for C<sub>12</sub>H<sub>13</sub>NO<sub>3</sub> [M+Na]<sup>+</sup>: 242.0793, found: 242.0790. FTIR: 3289, 3059, 2950, 1723, 1678, 1624, 1289, 1174, 770, 697, 585, 517 cm<sup>-1</sup>

### (Z)-methyl 3-acetamido-3-(2-methoxyphenyl)acrylate (3b)

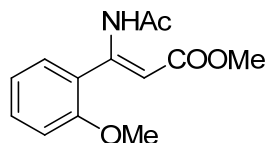

**3b** was obtained as a white solid.  $^1\text{H}$  NMR (400 MHz,  $\text{CDCl}_3$ )  $\delta$  10.92 (s, 1H), 7.35 (ddd,  $J = 8.3, 7.5, 1.8$  Hz, 1H), 7.17 (dd,  $J = 7.5, 1.8$  Hz, 1H), 6.95 (td,  $J = 7.5, 1.0$  Hz, 1H), 6.85 (dd,  $J = 8.3, 1.0$  Hz, 1H), 5.08 (s, 1H), 3.79 (s, 3H), 3.75 (s, 3H), 2.10 (s, 3H).  $^{13}\text{C}$  NMR (100 MHz,  $\text{CDCl}_3$ )  $\delta = 169.56, 167.53, 156.83, 152.73, 130.63, 128.84, 125.74, 120.50, 110.35, 98.86, 55.74, 51.39, 24.81$  ppm.

HRMS (ESI):  $m/z$  calculated for  $\text{C}_{13}\text{H}_{15}\text{NO}_4$   $[\text{M}+\text{Na}]^+$ : 272.0899, found: 272.0893.

FTIR: 3263, 3078, 2958, 1728, 1667, 1625, 1491, 1302, 1194, 750, 588, 502  $\text{cm}^{-1}$

### (Z)-methyl 3-acetamido-3-(4-methoxyphenyl)acrylate (3c)

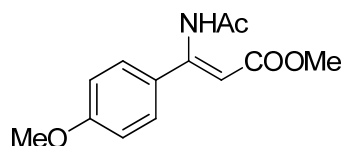

**3c** was obtained as white solid.  $^1\text{H}$  NMR (400 MHz,  $\text{CDCl}_3$ )  $\delta$  10.56 (s, 1H), 7.33 (d,  $J = 8.8$  Hz, 2H), 6.88 (d,  $J = 8.8$  Hz, 2H), 5.27 (s, 1H), 3.82 (s, 3H), 3.75 (s, 3H), 2.17 (s, 3H).  $^{13}\text{C}$  NMR (101 MHz,  $\text{CDCl}_3$ )  $\delta = 169.23, 168.74, 161.05, 154.51, 128.79, 128.03, 113.65, 99.62, 55.41, 51.44, 25.03$  ppm.

HRMS (ESI):  $m/z$  calculated for  $\text{C}_{13}\text{H}_{15}\text{NO}_4$   $[\text{M}+\text{Na}]^+$ : 272.0899, found: 272.0895.

FTIR: 3332, 2969, 2833, 1682, 1624, 1508, 1286, 1165, 1026, 823, 560, 489  $\text{cm}^{-1}$

### (Z)-methyl 3-acetamido-3-(o-tolyl)acrylate (3d)

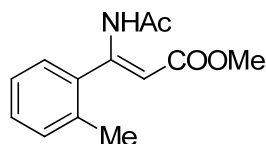

**3d** was obtained as white solid.  $^1\text{H}$  NMR (400 MHz,  $\text{CDCl}_3$ )  $\delta$  11.03 (s, 1H), 7.29–7.25 (m, 1H), 7.22–7.09 (m, 3H), 5.01 (s, 1H), 3.77 (s, 3H), 2.26 (s, 3H), 2.10 (s,

3H).  $^{13}\text{C}$  NMR (100 MHz,  $\text{CDCl}_3$ )  $\delta$  = 169.53, 167.52, 155.00, 136.21, 135.23, 129.76, 128.82, 127.48, 125.61, 98.83, 51.44, 24.73, 19.54 ppm.

HRMS (ESI):  $m/z$  calculated for  $\text{C}_{13}\text{H}_{15}\text{NO}_3$   $[\text{M}+\text{Na}]^+$ : 256.0950, found: 256.0952.

FTIR: 3278, 3063, 2951, 1727, 1677, 1620, 1487, 1295, 1175, 770, 602, 585, 472  $\text{cm}^{-1}$

### **(Z)-methyl 3-acetamido-3-(m-tolyl)acrylate (3e)**

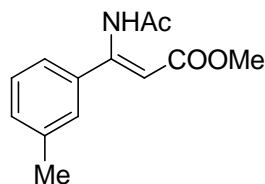

**3e** was obtained as white solid.  $^1\text{H}$  NMR (400 MHz,  $\text{CDCl}_3$ )  $\delta$  10.57 (s, 1H), 7.32 – 7.13 (m, 4H), 5.28 (s, 1H), 3.76 (s, 3H), 2.36 (s, 3H), 2.16 (s, 3H).  $^{13}\text{C}$  NMR (100 MHz,  $\text{CDCl}_3$ )  $\delta$  = 169.15, 168.54, 155.03, 137.88, 135.93, 130.60, 128.05, 127.73, 124.39, 100.56, 51.51, 24.93, 21.55 ppm.

HRMS (ESI):  $m/z$  calculated for  $\text{C}_{13}\text{H}_{15}\text{NO}_3$   $[\text{M}+\text{Na}]^+$ : 256.0950, found: 219.0948.

FTIR: 3289, 3059, 2950, 1723, 1678, 1624, 1289, 1174, 770, 697, 585, 517  $\text{cm}^{-1}$

### **(Z)-methyl 3-acetamido-3-(p-tolyl)acrylate (3f)**

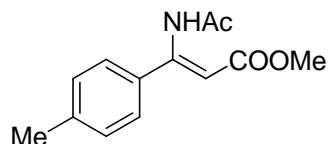

**3f** was obtained as white solid.  $^1\text{H}$  NMR (400 MHz,  $\text{CDCl}_3$ )  $\delta$  10.57 (s, 1H), 7.28 (d,  $J$  = 8.1 Hz, 2H), 7.17 (d,  $J$  = 7.9 Hz, 2H), 5.28 (s, 1H), 3.76 (s, 3H), 2.37 (s, 3H), 2.16 (s, 3H).  $^{13}\text{C}$  NMR (100 MHz,  $\text{CDCl}_3$ )  $\delta$  = 169.16, 168.60, 154.88, 139.99, 133.00, 128.92, 127.14, 100.16, 51.46, 24.94, 21.50 ppm.

HRMS (ESI):  $m/z$  calculated for  $\text{C}_{13}\text{H}_{15}\text{NO}_3$   $[\text{M}+\text{Na}]^+$ : 256.0950, found: 256.0944.

FTIR: 3263, 3078, 2958, 1728, 1667, 1625, 1491, 1275, 1022, 750, 588, 502  $\text{cm}^{-1}$

### **(Z)-methyl 3-acetamido-3-(naphthalen-2-yl)acrylate (3g)**

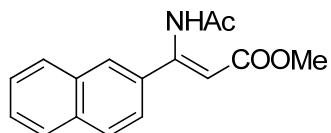

**3g** was obtained as white solid.  $^1\text{H}$  NMR (400 MHz,  $\text{CDCl}_3$ )  $\delta$  10.71 (s, 1H), 7.94 – 7.77 (m, 4H), 7.57 – 7.40 (m, 3H), 5.41 (s, 1H), 3.79 (s, 3H), 2.20 (s, 3H).  $^{13}\text{C}$  NMR (100 MHz,  $\text{CDCl}_3$ )  $\delta$  = 169.17, 168.60, 154.86, 134.00, 133.70, 133.00, 128.63, 127.85, 127.57, 127.02, 126.53, 124.93, 100.91, 51.60, 24.94 ppm.

HRMS (ESI):  $m/z$  calculated for  $\text{C}_{16}\text{H}_{15}\text{NO}_3$   $[\text{M}+\text{Na}]^+$ : 292.0950, found: 292.0950.

FTIR: 3277, 3057, 2922, 1722, 1674, 1617, 1286, 1167, 818, 745, 480  $\text{cm}^{-1}$ .

### (E)-methyl 3-acetamido-3-(naphthalen-2-yl)acrylate (**3g'**)

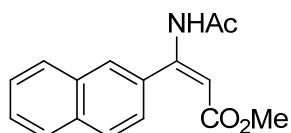

**3g'** obtained as white solid.  $^1\text{H}$  NMR (400 MHz,  $\text{CDCl}_3$ )  $\delta$  7.86 (t,  $J$  = 6.5 Hz, 3H), 7.79 (s, 1H), 7.58 – 7.48 (m, 2H), 7.40 (dd,  $J$  = 8.5, 1.8 Hz, 1H), 7.15 (s, 1H), 6.88 (s, 1H), 3.52 (s, 3H), 2.09 (s, 3H).  $^{13}\text{C}$  NMR (100 MHz,  $\text{CDCl}_3$ )  $\delta$  = 169.02, 167.72, 149.19, 134.15, 133.65, 133.01, 128.39, 128.19, 127.99, 127.15, 127.13, 126.73, 126.15, 103.88, 51.16, 25.14 ppm.

HRMS (ESI):  $m/z$  calculated for  $\text{C}_{16}\text{H}_{15}\text{NO}_3$   $[\text{M}+\text{Na}]^+$ : 292.0950, found: 292.0952.

FTIR: 3276, 3135, 2947, 1716, 1678, 1513, 1284, 1142, 820, 747, 474  $\text{cm}^{-1}$ .

### (Z)-methyl 3-acetamido-3-(4-fluorophenyl)acrylate (**3h**)

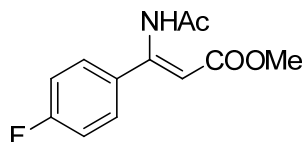

**3h** was obtained as white solid.  $^1\text{H}$  NMR (400 MHz,  $\text{CDCl}_3$ )  $\delta$  10.62 (s, 1H), 7.48 – 7.30 (m, 2H), 7.04 (t,  $J$  = 8.6 Hz, 2H), 5.25 (s, 1H), 3.77 (s, 3H), 2.17 (s, 3H).  $^{13}\text{C}$  NMR (100 MHz,  $\text{CDCl}_3$ )  $\delta$  = 169.03, 168.58, 163.66 (d,  $J$  = 249 Hz), 153.73, 131.92 (d,  $J$  = 4 Hz), 129.16 (d,  $J$  = 9 Hz), 115.31 (d,  $J$  = 22 Hz), 100.66, 51.59, 24.95 ppm.

HRMS (ESI):  $m/z$  calculated for  $C_{12}H_{12}FNO_3$   $[M+Na]^+$ : 260.0699, found: 260.0694.

FTIR: 3263, 3044, 2956, 1724, 1623, 1509, 1295, 1172, 844, 779, 544  $cm^{-1}$

### (Z)-methyl 3-acetamido-3-(4-chlorophenyl)acrylate (**3i**)

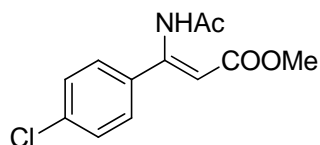

**3i** was obtained as white solid.  $^1H$  NMR (400 MHz,  $CDCl_3$ )  $\delta$  10.60 (s, 1H), 7.33 (d,  $J$  = 8.8 Hz, 2H), 7.29 (d,  $J$  = 8.8 Hz, 2H), 5.26 (s, 1H), 3.76 (s, 3H), 2.17 (s, 3H).  $^{13}C$  NMR (100 MHz,  $CDCl_3$ )  $\delta$  = 168.93, 168.53, 153.54, 135.73, 134.38, 128.49, 128.45, 100.93, 51.61, 24.87 ppm.

HRMS (ESI):  $m/z$  calculated for  $C_{12}H_{12}ClNO_3$   $[M+Na]^+$ : 276.0403, found: 276.0401.

FTIR: 3270, 2952, 1723, 1673, 1624, 1491, 1290, 1177, 813, 529, 474  $cm^{-1}$

### (Z)-methyl 3-acetamido-3-(4-bromophenyl)acrylate (**3j**)

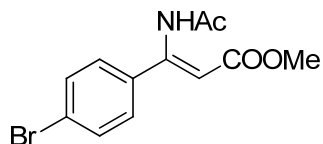

**3j** was obtained as white solid.  $^1H$  NMR (400 MHz,  $CDCl_3$ )  $\delta$  10.60 (s, 1H), 7.49 (d,  $J$  = 8.4 Hz, 2H), 7.23 (d,  $J$  = 8.5 Hz, 2H), 5.26 (s, 1H), 3.77 (s, 3H), 2.17 (s, 3H).  $^{13}C$  NMR (100 MHz,  $CDCl_3$ )  $\delta$  = 168.94, 168.55, 153.62, 134.88, 131.43, 128.74, 124.05, 100.95, 51.64, 24.89 ppm.

HRMS (ESI):  $m/z$  calculated for  $C_{12}H_{12}BrNO_3$   $[M+Na]^+$ : 319.9898, found: 319.9898

FTIR: 3286, 2950, 1723, 1681, 1622, 1488, 1288, 1176, 820, 717, 522  $cm^{-1}$

### (Z)-methyl 3-acetamido-3-(4-iodophenyl)acrylate (**3k**)

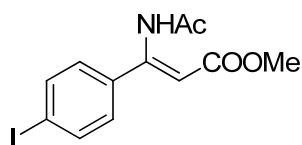

**3k** was obtained as white solid.  $^1\text{H}$  NMR (400 MHz,  $\text{CDCl}_3$ )  $\delta$  10.59 (s, 0H), 7.69 (d,  $J = 8.5$  Hz, 1H), 7.10 (d,  $J = 8.3$  Hz, 1H), 5.26 (s, 0H), 3.76 (d,  $J = 2.2$  Hz, 1H), 2.16 (d,  $J = 2.4$  Hz, 1H).  $^{13}\text{C}$  NMR (100 MHz,  $\text{CDCl}_3$ )  $\delta = 168.94, 168.54, 153.74, 137.36, 135.51, 128.82, 100.96, 95.99, 51.65, 24.88$  ppm.

HRMS (ESI):  $m/z$  calculated for  $\text{C}_{12}\text{H}_{12}\text{INO}_3$   $[\text{M}+\text{Na}]^+$ : 367.9760, found: 367.9758

FTIR: 3435, 3242, 2957, 1727, 1673, 1619, 1848, 1288, 1176, 816, 697, 520, 467  $\text{cm}^{-1}$

### (Z)-methyl 4-(1-acetamido-3-methoxy-3-oxoprop-1-en-1-yl)benzoate

(3l)

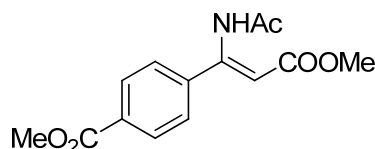

**3l** was obtained as white solid.  $^1\text{H}$  NMR (400 MHz,  $\text{CDCl}_3$ )  $\delta$  10.63 (s, 1H), 8.02 (d,  $J = 8.3$  Hz, 2H), 7.42 (d,  $J = 8.3$  Hz, 2H), 5.30 (s, 1H), 3.91 (s, 3H), 3.77 (s, 3H), 2.17 (s, 3H).  $^{13}\text{C}$  NMR (100 MHz,  $\text{CDCl}_3$ )  $\delta = 168.87, 168.46, 166.62, 153.64, 140.49, 131.02, 129.48, 127.16, 101.59, 52.34, 51.69, 24.79$  ppm.

HRMS (ESI):  $m/z$  calculated for  $\text{C}_{14}\text{H}_{15}\text{NO}_5$   $[\text{M}+\text{Na}]^+$ : 300.0848, found: 300.0847.

FTIR: 3326, 2953, 1710, 1680, 1628, 1501, 1432, 1285, 1172, 1109, 855, 776, 709, 566  $\text{cm}^{-1}$

### (Z)-methyl 3-acetamido-3-(benzofuran-3-yl)acrylate (3m)

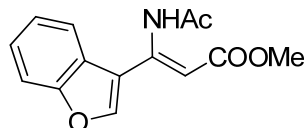

**3m** was obtained as white solid.  $^1\text{H}$  NMR (400 MHz,  $\text{CDCl}_3$ )  $\delta$  10.15 (s, 1H), 7.58 (d,  $J = 7.7$  Hz, 1H), 7.46 (d,  $J = 8.3$  Hz, 1H), 7.33 (t,  $J = 7.5$  Hz, 1H), 7.23 (t,  $J = 7.5$  Hz, 1H), 7.08 (s, 1H), 5.92 (s, 1H), 3.78 (s, 3H), 2.23 (s, 3H).  $^{13}\text{C}$  NMR (100 MHz,  $\text{CDCl}_3$ )  $\delta = 168.75, 168.74, 155.02, 149.67, 142.47, 128.00, 126.10, 123.29, 121.93, 111.46, 109.77, 101.27, 51.64, 24.59$  ppm.

HRMS (ESI):  $m/z$  calculated for  $\text{C}_{14}\text{H}_{13}\text{NO}_4$   $[\text{M}+\text{Na}]^+$ : 282.0742, found: 282.0739.



FTIR: 3293, 3014, 2946, 1711, 1692, 1630, 1556, 1283, 1217, 816, 755, 628, 512  $\text{cm}^{-1}$

**(Z)-methyl 3-acetamido-3-(furan-3-yl)acrylate (3n)**

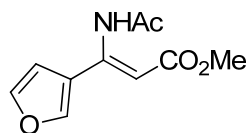

**3n** was obtained as white solid.  $^1\text{H}$  NMR (400 MHz,  $\text{CDCl}_3$ )  $\delta$  10.28 (s, 1H), 7.39 (dd,  $J = 5.1, 1.2$  Hz, 1H), 7.27 (dd,  $J = 3.6, 1.3$  Hz, 1H), 7.02 (dd,  $J = 5.0, 3.7$  Hz, 1H), 5.52 (s, 1H), 3.76 (s, 3H), 2.19 (s, 3H).  $^{13}\text{C}$  NMR (100 MHz,  $\text{CDCl}_3$ )  $\delta = 169.03, 168.78, 147.38, 137.74, 128.58, 128.10, 127.38, 100.89, 51.59, 24.90$  ppm.

HRMS (ESI):  $m/z$  calculated for  $\text{C}_{10}\text{H}_{11}\text{NO}_4$   $[\text{M}+\text{Na}]^+$ : 232.0586, found: 232.0583.

FTIR: 3290, 3101, 2949, 1681, 1616, 1510, 1273, 1171, 1042, 827, 710  $\text{cm}^{-1}$

**(Z)-methyl 3-acetamido-3-(thiophen-3-yl)acrylate (3o)**

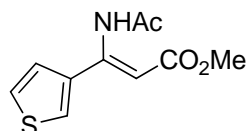

**3o** was obtained as white solid.  $^1\text{H}$  NMR (400 MHz,  $\text{CDCl}_3$ )  $\delta$  10.17 (s, 1H), 7.46 (d,  $J = 1.8$  Hz, 1H), 6.75 (d,  $J = 3.5$  Hz, 1H), 6.46 (dd,  $J = 3.3, 1.8$  Hz, 1H), 5.68 (s, 1H), 3.75 (s, 3H), 2.20 (s, 3H).  $^{13}\text{C}$  NMR (100 MHz,  $\text{CDCl}_3$ )  $\delta = 169.22, 168.78, 148.08, 144.23, 142.54, 113.93, 112.02, 98.73, 51.61, 24.77$  ppm.

HRMS (ESI):  $m/z$  calculated for  $\text{C}_{10}\text{H}_{11}\text{NO}_3\text{S}$   $[\text{M}+\text{Na}]^+$ : 248.0357, found: 248.0358.

FTIR: 3303, 3143, 2951, 1718, 1629, 1475, 1289, 1199, 822, 748, 592, 504  $\text{cm}^{-1}$

**(Z)-methyl 3-acetamido-3-cyclohexylacrylate (3p)**

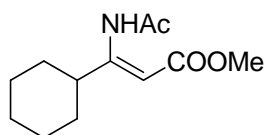

**3p** was obtained as white solid.  $^1\text{H}$  NMR (400 MHz,  $\text{CDCl}_3$ )  $\delta$  11.10 (s, 1H), 5.01 (s, 1H), 3.67 (s, 3H), 3.58 – 3.40 (m, 1H), 2.11 (s, 3H), 1.90 – 1.86 (m, 2H), 1.80 – 1.65 (m, 3H), 1.40 – 1.31 (m, 2H), 1.21 – 1.02 (m, 3H).  $^{13}\text{C}$  NMR (100 MHz,  $\text{CDCl}_3$ )  $\delta$  = 170.22, 168.52, 164.68, 92.69, 51.16, 39.41, 32.18, 26.40, 26.30, 25.72 ppm.

HRMS (ESI):  $m/z$  calculated for  $\text{C}_{12}\text{H}_{19}\text{NO}_3$   $[\text{M}+\text{Na}]^+$ : 248.1263, found: 248.1260.

FTIR: 3429, 2927, 2853, 1717, 1674, 1628, 1493, 1250, 1222, 1165, 814, 670  $\text{cm}^{-1}$

### (Z)-ethyl 3-acetamido-3-phenylacrylate (3q)

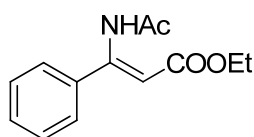

**3q** was obtained as colorless oil.  $^1\text{H}$  NMR (400 MHz,  $\text{CDCl}_3$ )  $\delta$  10.64 (s, 1H), 7.49 – 7.29 (m, 5H), 5.28 (s, 1H), 4.22 (q,  $J = 7.1$  Hz, 2H), 2.16 (s, 3H), 1.32 (t,  $J = 7.2$  Hz, 3H).  $^{13}\text{C}$  NMR (100 MHz,  $\text{CDCl}_3$ )  $\delta$  = 168.70, 168.52, 154.59, 136.00, 129.65, 128.13, 127.15, 101.18, 60.39, 24.88, 14.36 ppm.

HRMS (ESI):  $m/z$  calculated for  $\text{C}_{13}\text{H}_{15}\text{NO}_3$   $[\text{M}+\text{Na}]^+$ : 256.0950, found: 256.0948.

FTIR: 3293, 2979, 1723, 1672, 1622, 1491, 1285, 1179, 1036, 769, 697  $\text{cm}^{-1}$

### (Z)-N-(3-oxo-1,3-diphenylprop-1-en-1-yl)acetamide (3r)

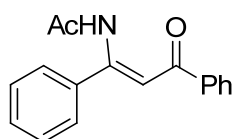

**3r** was obtained as yellow solid.  $^1\text{H}$  NMR (400 MHz,  $\text{CDCl}_3$ )  $\delta$  12.27 (s, 1H), 8.00 – 7.93 (m, 2H), 7.61 – 7.53 (m, 1H), 7.52 – 7.38 (m, 7H), 6.33 (s, 1H), 2.24 (s, 3H).  $^{13}\text{C}$  NMR (100 MHz,  $\text{CDCl}_3$ )  $\delta$  = 191.79, 169.03, 156.36, 138.71, 136.33, 132.87, 129.93, 128.78, 128.21, 127.93, 127.50, 104.90, 25.21 ppm.

HRMS (ESI):  $m/z$  calculated for  $\text{C}_{17}\text{H}_{15}\text{NO}_2$   $[\text{M}+\text{Na}]^+$ : 288.1000, found: 288.0009.

FTIR: 3294, 3059, 1718, 1623, 1570, 1442, 1289, 1211, 1043, 759, 694, 525  $\text{cm}^{-1}$

### methyl 3-acetamido-1H-indene-2-carboxylate (4a)

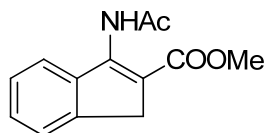

**4a** was obtained as white solid.  $^1\text{H}$  NMR (400 MHz,  $\text{CDCl}_3$ )  $\delta$  10.18 (s, 1H), 8.15 – 8.17 (m, 1H), 7.52 – 7.32 (m, 3H), 3.85 (s, 3H), 3.62 (s, 2H), 2.30 (s, 3H).  $^{13}\text{C}$  NMR (100 MHz,  $\text{CDCl}_3$ )  $\delta$  = 168.56, 167.74, 151.38, 143.75, 137.96, 128.79, 126.94, 126.72, 124.10, 112.89, 51.57, 35.51, 24.75 ppm.

HRMS (ESI):  $m/z$  calculated for  $\text{C}_{13}\text{H}_{13}\text{NO}_3$   $[\text{M}+\text{Na}]^+$ : 254.0793, found: 254.0795.

FTIR: 3288, 2953, 1703, 1674, 1618, 1501, 1379, 1329, 1198, 762, 636, 528  $\text{cm}^{-1}$

### methyl 3-benzamido-1H-indene-2-carboxylate (**4b**)

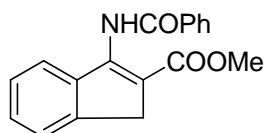

**4b** was obtained as white solid.  $^1\text{H}$  NMR (400 MHz,  $\text{CDCl}_3$ )  $\delta$  11.20 (s, 1H), 8.48 – 8.25 (m, 1H), 8.22 – 8.01 (m, 2H), 7.65 – 7.34 (m, 6H), 3.86 (s, 3H), 3.67 (s, 2H).  $^{13}\text{C}$  NMR (100 MHz,  $\text{CDCl}_3$ )  $\delta$  = 168.15, 165.13, 151.98, 143.92, 137.87, 133.86, 132.62, 129.03, 128.89, 128.07, 127.23, 126.80, 124.17, 113.29, 51.71, 35.61 ppm.

HRMS (ESI):  $m/z$  calculated for  $\text{C}_{18}\text{H}_{15}\text{NO}_3$   $[\text{M}+\text{Na}]^+$ : 316.0950, found: 316.0948.

FTIR: 3274, 2947, 1692, 1662, 1613, 1565, 1328, 1271, 1204, 1010, 757, 705, 762  $\text{cm}^{-1}$

### methyl 3-pivalamido-1H-indene-2-carboxylate (**4c**)

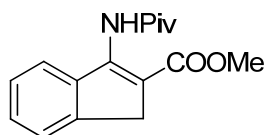

**4c** was obtained as white solid.  $^1\text{H}$  NMR (400 MHz,  $\text{CDCl}_3$ )  $\delta$  10.51 (s, 1H), 8.22 – 8.13 (m, 1H), 7.52 – 7.28 (m, 3H), 3.85 (s, 3H), 3.61 (s, 2H), 1.40 (s, 9H).  $^{13}\text{C}$  NMR (100 MHz,  $\text{CDCl}_3$ )  $\delta$  = 177.42, 167.86, 151.99, 143.87, 138.06, 128.72, 127.11, 126.65, 124.06, 112.83, 51.59, 40.18, 35.54, 27.77 ppm.

HRMS (ESI):  $m/z$  calculated for  $\text{C}_{16}\text{H}_{19}\text{NO}_3$   $[\text{M}+\text{Na}]^+$ : 296.1263, found: 296.1254.

FTIR: 3306, 2965, 1702, 1677, 1617, 1491, 1255, 1204, 759, 554  $\text{cm}^{-1}$

### methyl 3-acetamido-5-methoxy-1H-indene-2-carboxylate (4d)

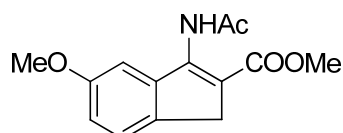

**4d** was obtained as white solid.  $^1\text{H}$  NMR (400 MHz,  $\text{CDCl}_3$ )  $\delta$  10.25 (s, 1H), 7.80 (d,  $J = 2.6$  Hz, 1H), 7.31 (d,  $J = 8.3$  Hz, 1H), 6.97 (d,  $J = 8.2$  Hz, 1H), 3.85 (s, 3H), 3.84 (s, 3H), 3.53 (s, 2H), 2.30 (s, 3H).  $^{13}\text{C}$  NMR (100 MHz,  $\text{CDCl}_3$ )  $\delta = 168.60, 167.75, 158.75, 151.41, 139.03, 136.19, 124.56, 116.97, 113.85, 110.75, 55.66, 51.56, 34.75, 24.80$  ppm.

HRMS (ESI):  $m/z$  calculated for  $\text{C}_{14}\text{H}_{15}\text{NO}_4$   $[\text{M}+\text{Na}]^+$ : 284.0899, found: 284.0896

FTIR: 3286, 2957, 1717, 1668, 1594, 1570, 1303, 1258, 1230, 1030, 819, 764, 554  $\text{cm}^{-1}$

### methyl 3-acetamido-5-methyl-1H-indene-2-carboxylate(4e)

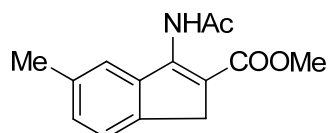

**4e** was obtained as white solid.  $^1\text{H}$  NMR (400 MHz,  $\text{CDCl}_3$ )  $\delta$  10.14 (s, 1H), 7.95 (s, 1H), 7.32 (d,  $J = 7.7$  Hz, 1H), 7.19 (d,  $J = 7.7$  Hz, 1H), 3.83 (s, 3H), 3.55 (s, 2H), 2.41 (s, 3H), 2.30 (s, 3H).  $^{13}\text{C}$  NMR (100 MHz,  $\text{CDCl}_3$ )  $\delta = 168.59, 167.76, 151.36, 140.97, 138.13, 136.38, 129.90, 127.15, 123.78, 113.29, 51.52, 35.11, 24.74, 21.74$  ppm.

HRMS (ESI):  $m/z$  calculated for  $\text{C}_{14}\text{H}_{15}\text{NO}_3$   $[\text{M}+\text{Na}]^+$ : 268.0950, found: 268.0946.

FTIR: 3278, 2946, 1688, 1593, 1432, 1304, 1253, 1193, 1084, 813, 682  $\text{cm}^{-1}$

### methyl 3-acetamido-7-acetoxy-1H-indene-2-carboxylate (4f)

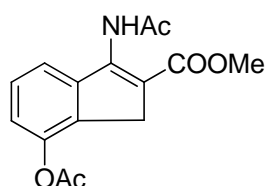

**4f** was obtained as white solid.  $^1\text{H}$  NMR (400 MHz,  $\text{CDCl}_3$ )  $\delta$  10.13 (s, 1H), 8.07 (d,  $J = 7.7$  Hz, 1H), 7.37 (t,  $J = 8.0$  Hz, 1H), 7.12 (d,  $J = 8.0$  Hz, 1H), 3.84 (s, 3H), 3.51 (s, 2H), 2.35 (s, 3H), 2.29 (s, 3H).  $^{13}\text{C}$  NMR (100 MHz,  $\text{CDCl}_3$ )  $\delta = 168.80, 168.55, 167.44, 150.80, 146.43, 140.11, 135.20, 128.22, 125.09, 121.99, 113.04, 51.66, 32.87, 24.73, 21.02$  ppm.

HRMS (ESI):  $m/z$  calculated for  $\text{C}_{15}\text{H}_{15}\text{NO}_5$   $[\text{M}+\text{Na}]^+$ : 312.0848, found: 312.0845.

FTIR: 3288, 2954, 1766, 1701, 1673, 1504, 1385, 1210, 953, 750, 672, 551  $\text{cm}^{-1}$

### methyl 3-acetamido-5-fluoro-1H-indene-2-carboxylate(**4g**)

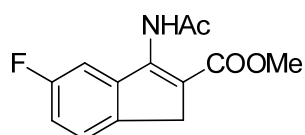

**4g** was obtained as white solid.  $^1\text{H}$  NMR (400 MHz,  $\text{CDCl}_3$ )  $\delta$  10.17 (s, 1H), 7.92 (dd,  $J = 10.1, 2.5$  Hz, 1H), 7.34 (dd,  $J = 8.3, 5.1$  Hz, 1H), 7.07 (td,  $J = 8.6, 2.5$  Hz, 1H), 3.84 (s, 3H), 3.55 (s, 2H), 2.29 (s, 3H).  $^{13}\text{C}$  NMR (101 MHz,  $\text{CDCl}_3$ )  $\delta = 168.58, 167.47, 161.85$  ( $J = 241$ ),  $150.58$  ( $J = 3$ ),  $139.55$  ( $J = 10$ ),  $139.06$  ( $J = 2$ ),  $124.85$  ( $J = 8$ ),  $116.05$  ( $J = 23$ ),  $114.55, 114.03$  ( $J = 25$ ),  $51.68, 34.88, 24.68$  ppm.

HRMS (ESI):  $m/z$  calculated for  $\text{C}_{13}\text{H}_{12}\text{FNO}_3$   $[\text{M}+\text{Na}]^+$ : 272.0699, found: 272.0696

FTIR: 3219, 2955, 1713, 1663, 1575, 1431, 1298, 1207, 823, 771, 549  $\text{cm}^{-1}$

### methyl 3-acetamido-6-bromo-1H-indene-2-carboxylate (**4h**)

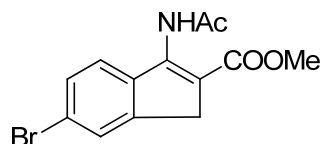

**4h** was obtained as white solid.  $^1\text{H}$  NMR (400 MHz,  $\text{CDCl}_3$ )  $\delta$  10.20 (s, 1H), 8.06 (d,  $J = 8.5$  Hz, 1H), 7.58 (s, 1H), 7.48 (d,  $J = 8.6$ , 1H), 3.85 (s, 3H), 3.59 (s, 2H), 2.29 (s, 3H).  $^{13}\text{C}$  NMR (100 MHz,  $\text{CDCl}_3$ )  $\delta = 168.62, 167.50, 150.64, 145.57, 136.89, 130.01, 128.40, 127.34, 123.53, 112.82, 51.70, 35.38, 24.75$  ppm.

HRMS (ESI):  $m/z$  calculated for  $\text{C}_{13}\text{H}_{12}\text{BrNO}_3$   $[\text{M}+\text{Na}]^+$ : 331.9898, found: 331.9895.

FTIR: 3284, 2958, 1685, 1681, 1613, 1326, 1247, 1201, 854, 649  $\text{cm}^{-1}$

### methyl 7-acetamido-5H-indeno[5,6-d][1,3]dioxole-6-carboxylate (**4i**)

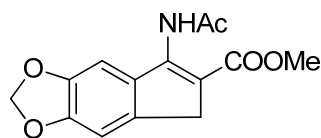

**4i** was obtained as white solid.  $^1\text{H}$  NMR (400 MHz,  $\text{CDCl}_3$ )  $\delta$  10.20 (s, 1H), 7.67 (s, 1H), 6.89 (s, 1H), 6.00 (s, 2H), 3.82 (s, 3H), 3.52 (s, 2H), 2.28 (s, 3H).  $^{13}\text{C}$  NMR (100 MHz,  $\text{CDCl}_3$ )  $\delta$  = 168.63, 167.41, 151.54, 149.37, 147.01, 139.63, 131.60, 111.71, 107.13, 104.65, 101.64, 51.41, 35.34, 24.76 ppm.

HRMS (ESI):  $m/z$  calculated for  $\text{C}_{14}\text{H}_{13}\text{NO}_5$   $[\text{M}+\text{Na}]^+$ : 298.0691, found: 298.0695

FTIR: 3289, 2950, 1688, 1671, 1587, 1469, 1385, 1231, 1035, 933, 669  $\text{cm}^{-1}$

### methyl 3-acetamido-1-methyl-1H-indene-2-carboxylate (**4j**)

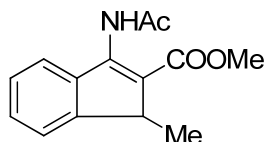

**4j** was obtained as white solid.  $^1\text{H}$  NMR (400 MHz,  $\text{CDCl}_3$ )  $\delta$  10.26 (s, 1H), 8.19 – 8.04 (m, 1H), 7.46 – 7.29 (m, 3H), 3.86 (s, 3H), 3.69 (q,  $J$  = 7.3 Hz, 1H), 2.29 (s, 3H), 1.41 (d,  $J$  = 7.3 Hz, 3H).  $^{13}\text{C}$  NMR (100 MHz,  $\text{CDCl}_3$ )  $\delta$  = 168.62, 167.86, 151.03, 150.18, 136.38, 129.06, 126.99, 126.79, 123.00, 118.34, 51.47, 41.47, 24.78, 17.33 ppm.

HRMS (ESI):  $m/z$  calculated for  $\text{C}_{14}\text{H}_{15}\text{NO}_3$   $[\text{M}+\text{Na}]^+$ : 268.0950, found: 268.0947

FTIR: 3302, 2950, 1715, 1664, 1614, 1568, 1385, 1254, 1196, 1091, 756, 536  $\text{cm}^{-1}$

### methyl 1-acetamido-3,4-dihydronaphthalene-2-carboxylate (**4k**)

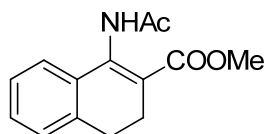

**4k** was obtained as white solid.  $^1\text{H}$  NMR (400 MHz,  $\text{CDCl}_3$ )  $\delta$  10.14 (s, 1H), 7.33 (dd,  $J$  = 7.6, 1.5 Hz, 1H), 7.27 – 7.13 (m, 3H), 3.80 (s, 3H), 2.77 (t,  $J$  = 7.6 Hz, 2H), 2.57 (t,  $J$  = 7.6 Hz, 2H), 2.22 (s, 3H).  $^{13}\text{C}$  NMR (100 MHz,  $\text{CDCl}_3$ )  $\delta$  = 169.64, 169.12,

145.71, 137.87, 130.22, 129.73, 127.41, 127.01, 126.00, 113.71, 52.02, 27.72, 24.65, 22.38 ppm.

HRMS (ESI): m/z calculated for C<sub>14</sub>H<sub>15</sub>NO<sub>3</sub> [M+Na]<sup>+</sup>: 268.0950, found: 268.0942

FTIR: 3259, 2945, 2835, 1696, 1664, 1527, 1313, 1122, 997, 766, 729, 575 cm<sup>-1</sup>

### **methyl 9-acetamido-6,7-dihydro-5H-benzo[7]annulene-8-carboxylate**

**(4I)**

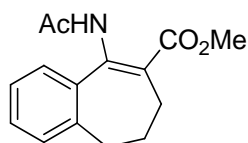

**4I** was obtained as white solid. <sup>1</sup>H NMR (400 MHz, CDCl<sub>3</sub>) δ 10.61 (s, 1H), 7.31 – 7.19 (m, 4H), 3.80 (s, 3H), 2.66 (t, *J* = 6.6 Hz, 2H), 2.21 – 1.98 (m, 7H). <sup>13</sup>C NMR (100 MHz, CDCl<sub>3</sub>) δ = 169.94, 168.76, 148.81, 140.53, 135.96, 129.18, 128.85, 127.45, 125.83, 110.51, 51.90, 34.65, 31.42, 24.77, 23.92 ppm.

HRMS (ESI): m/z calculated for C<sub>15</sub>H<sub>17</sub>NO<sub>3</sub> [M+Na]<sup>+</sup>: 282.1106, found: 282.1102

FTIR: 3252, 3016, 2935, 1708, 1669, 1620, 1530, 1427, 1324, 1199, 767, 561cm<sup>-1</sup>

## **4. References**

[1] Taniguchi, T.; Sugiura, Y.; Zaimoku, H.; Ishibashi, H. *Angew.Chem., Int. Ed.* 2010, 49, 10154.

[2] Ch Chen.; E Zhan.; Y Li.;W Shen. *J. Mole .Cat A:Chemical.*2013, 379,117.

## 6. NMR spectra for the products

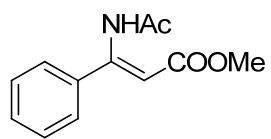

3a

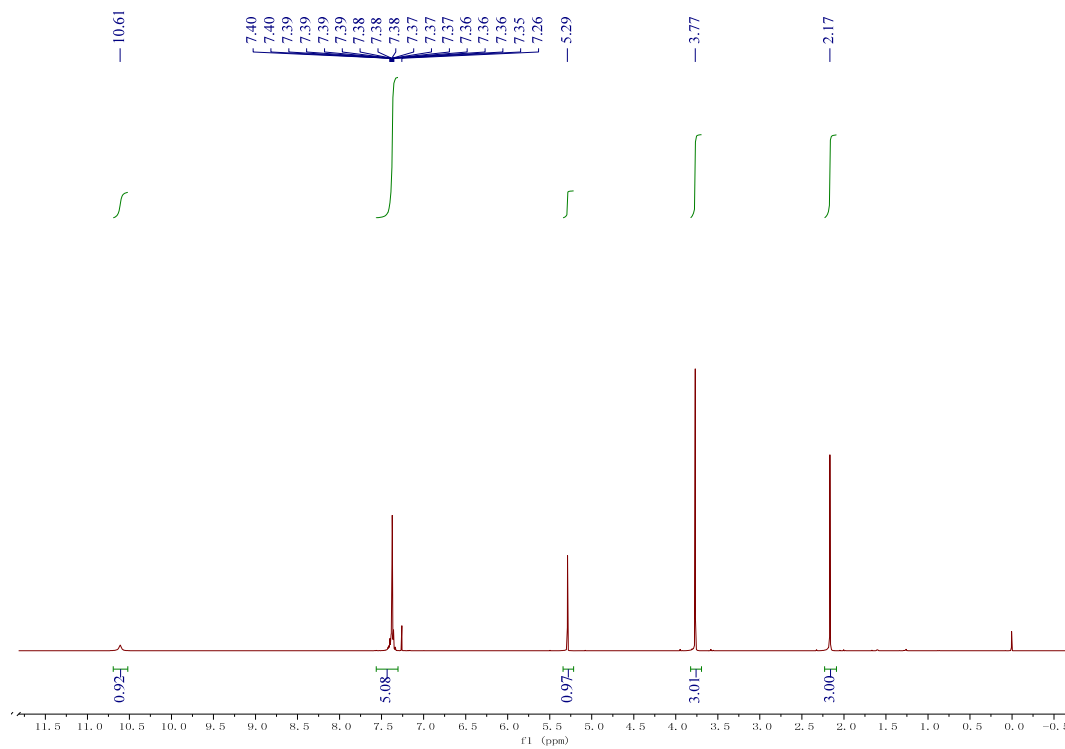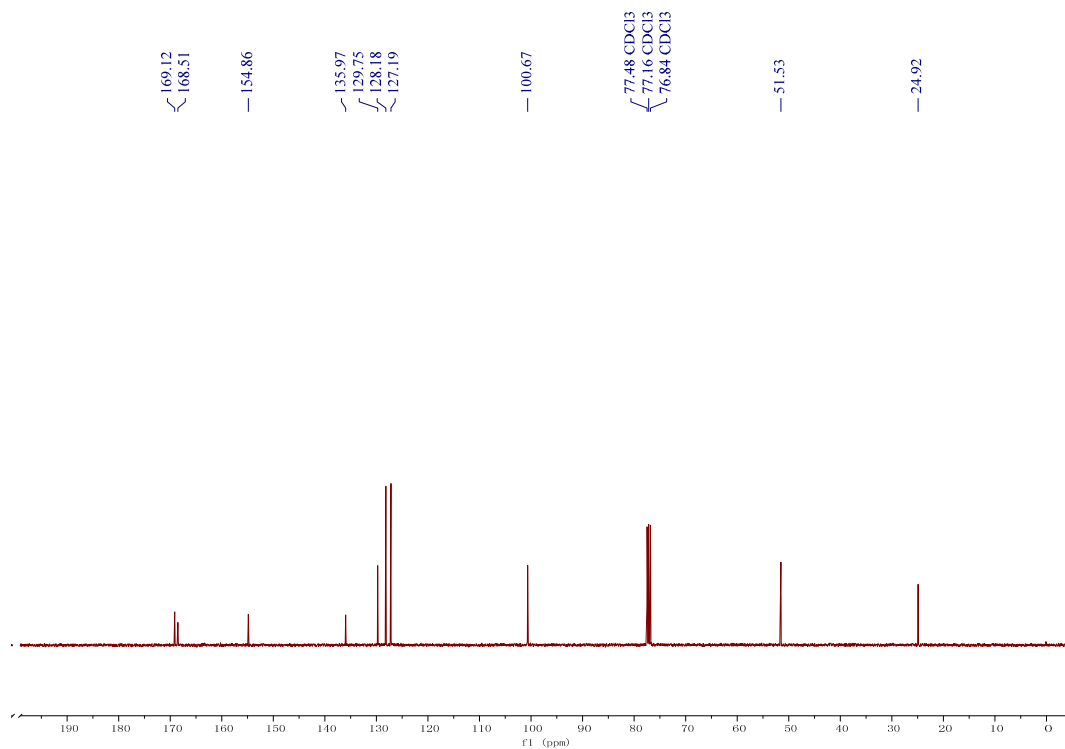



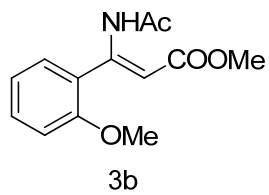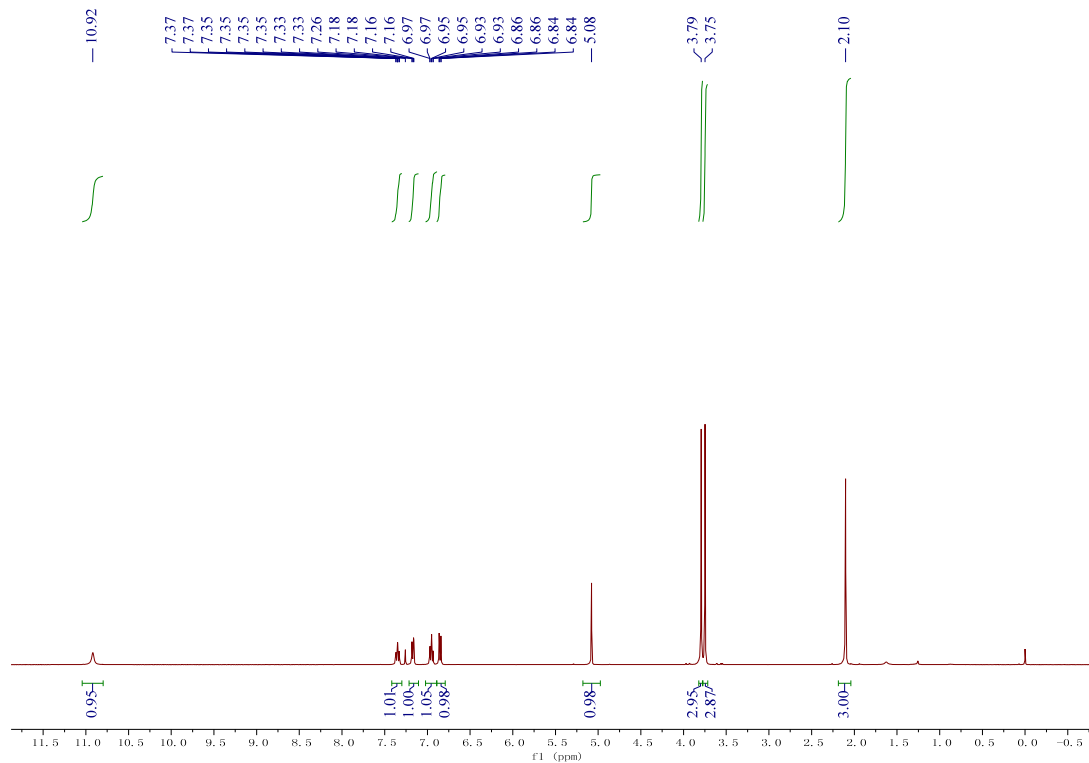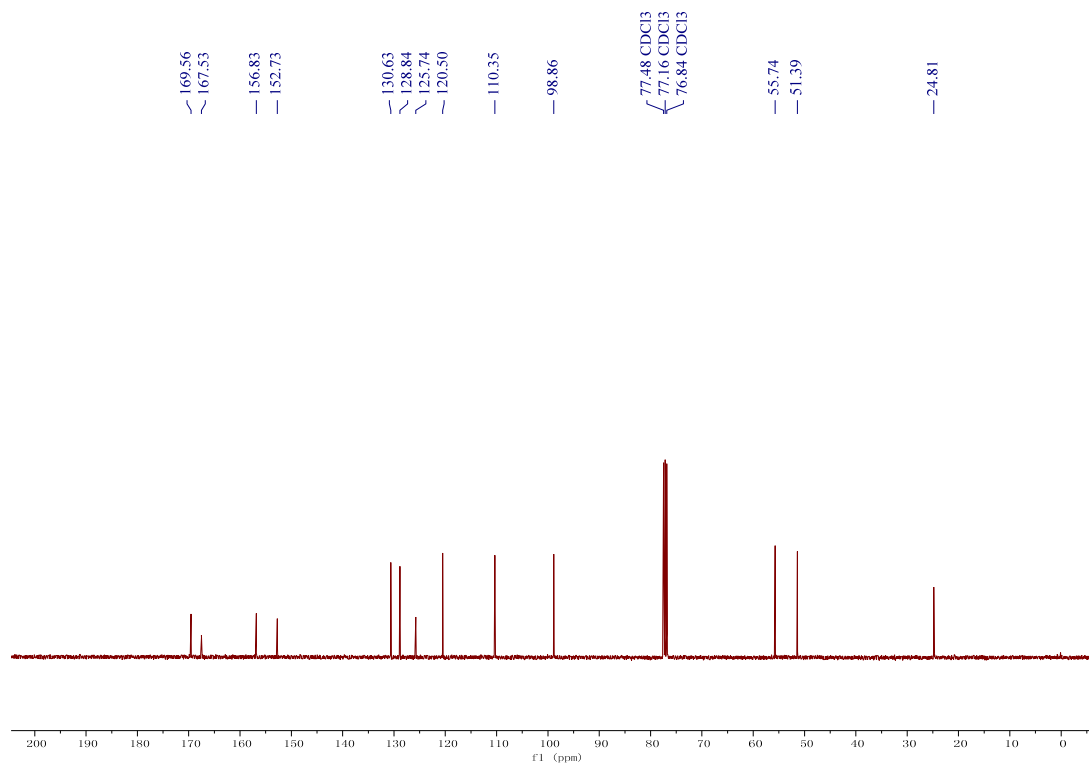

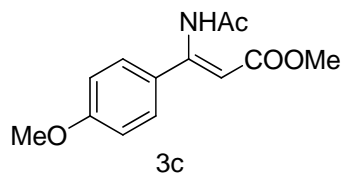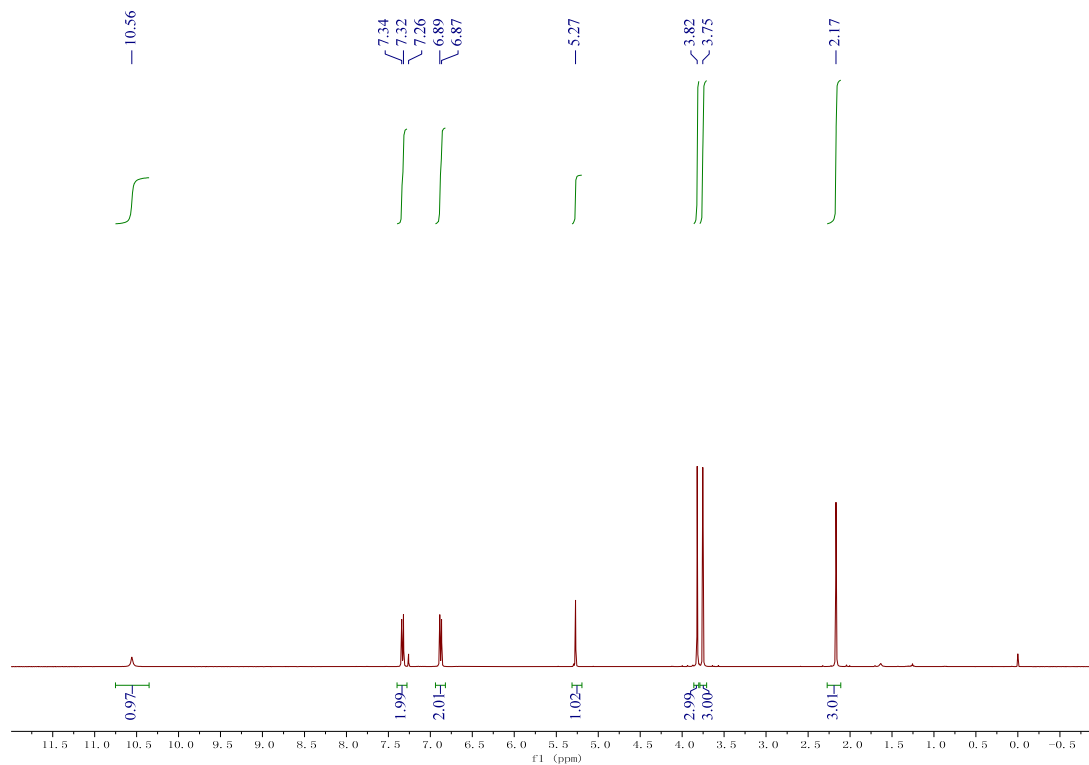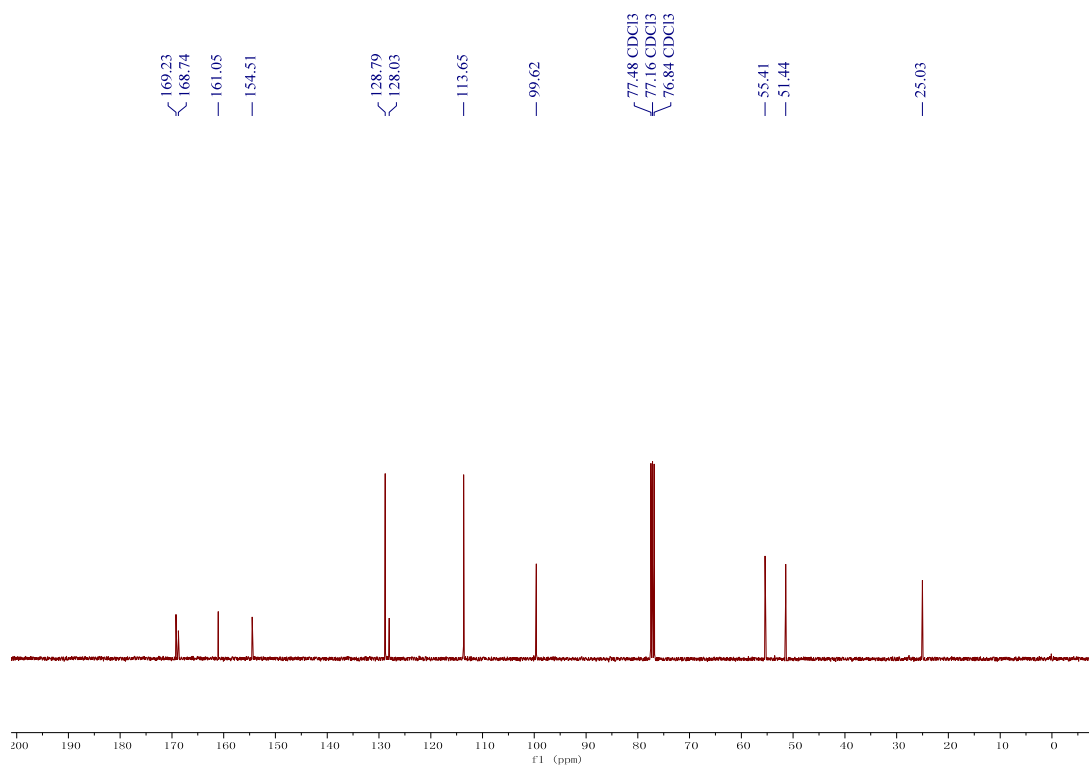

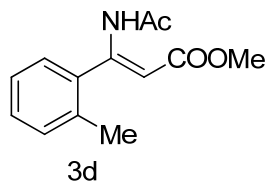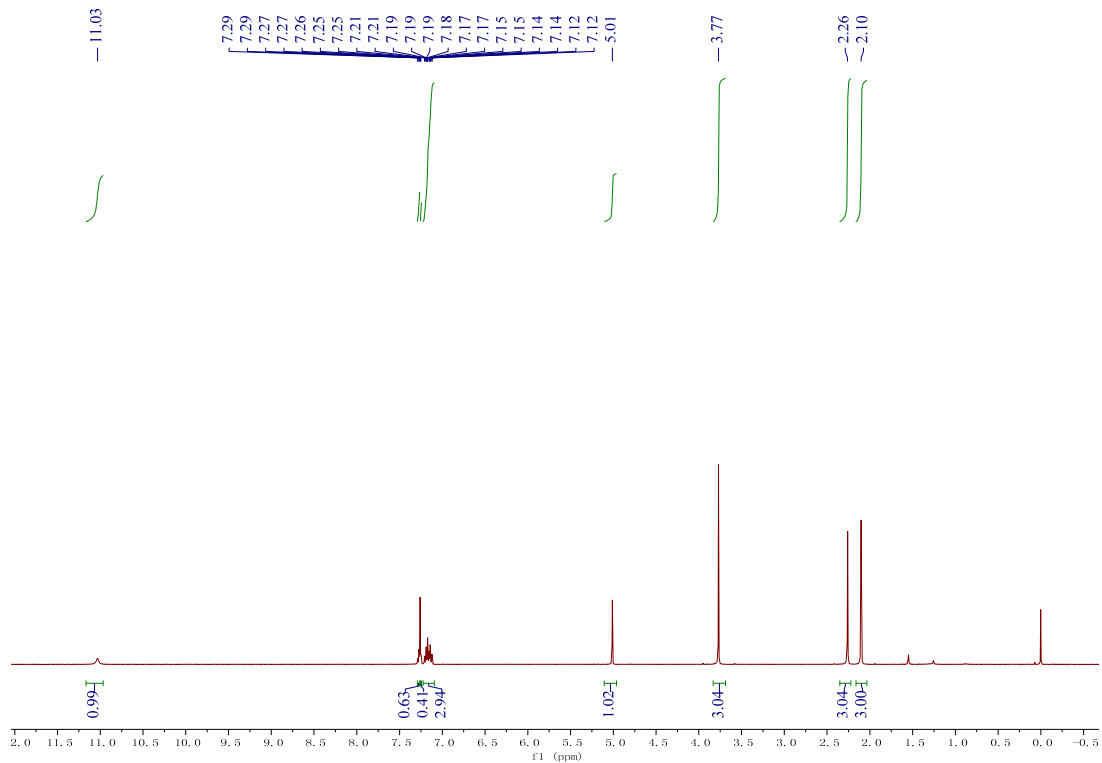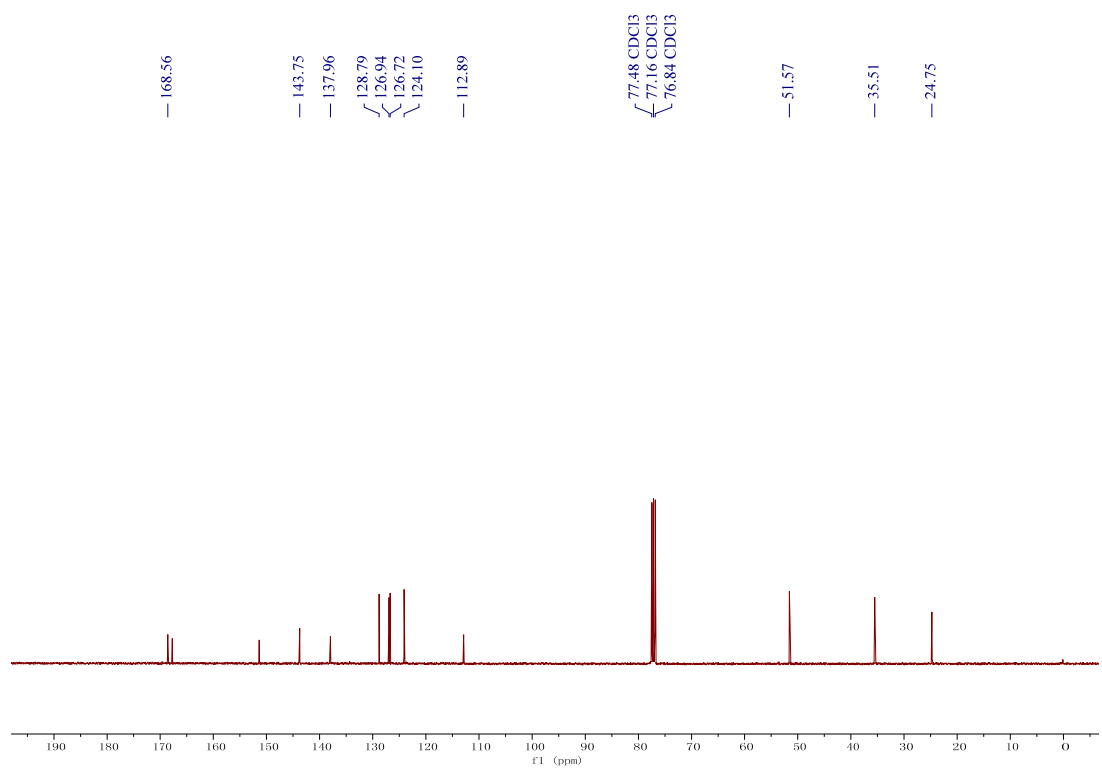

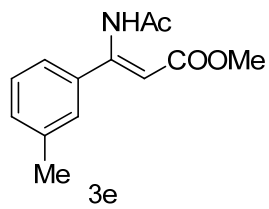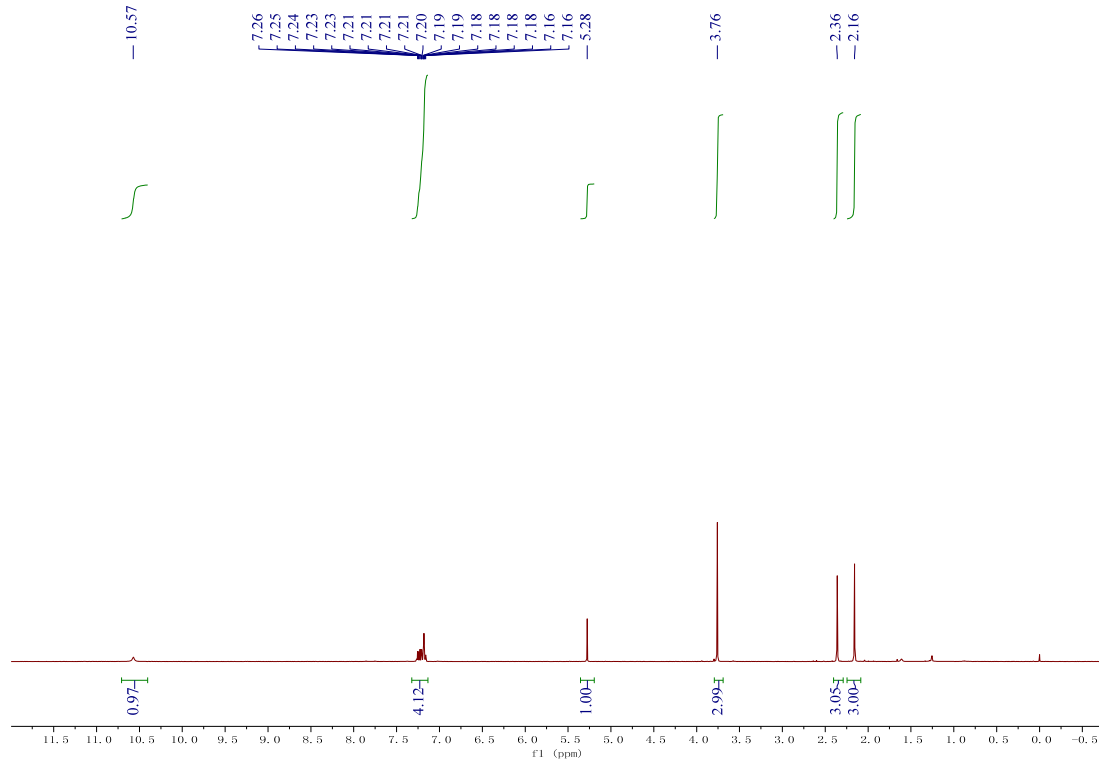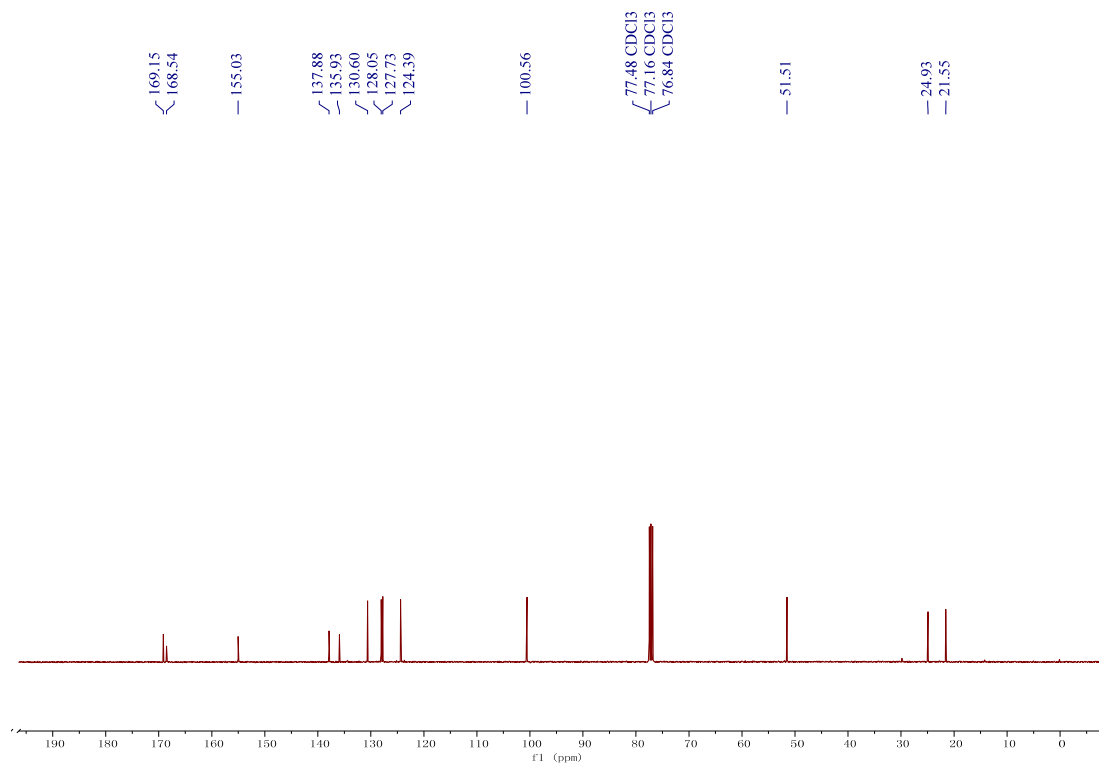

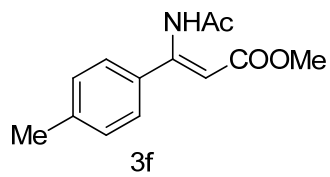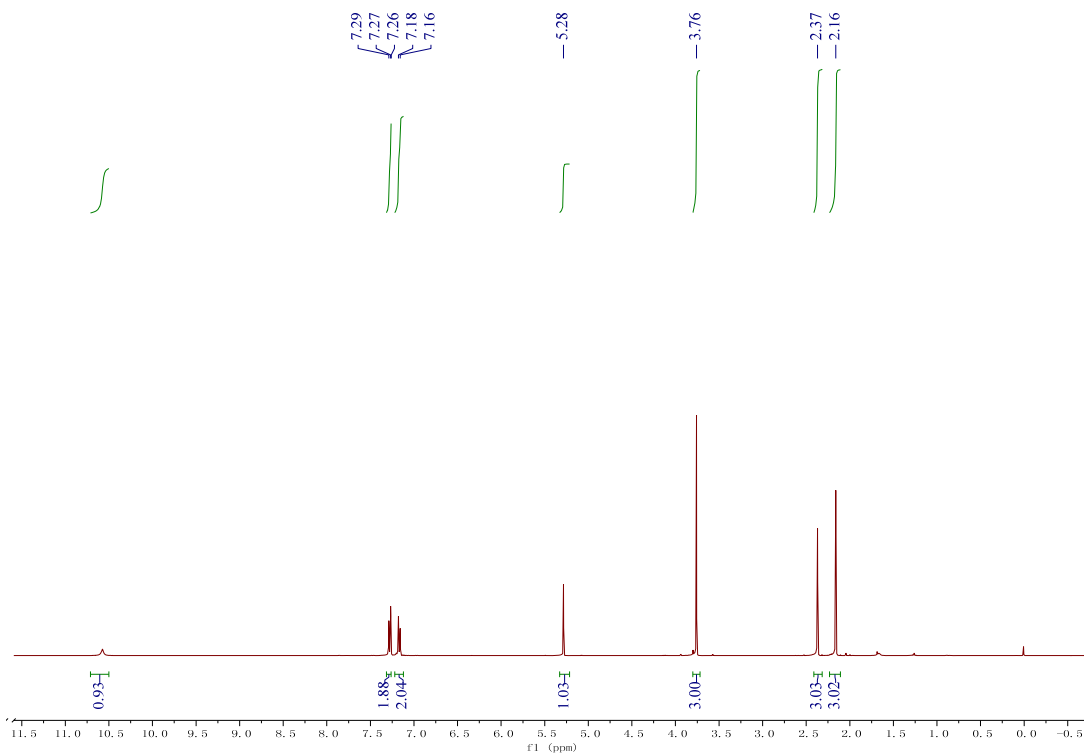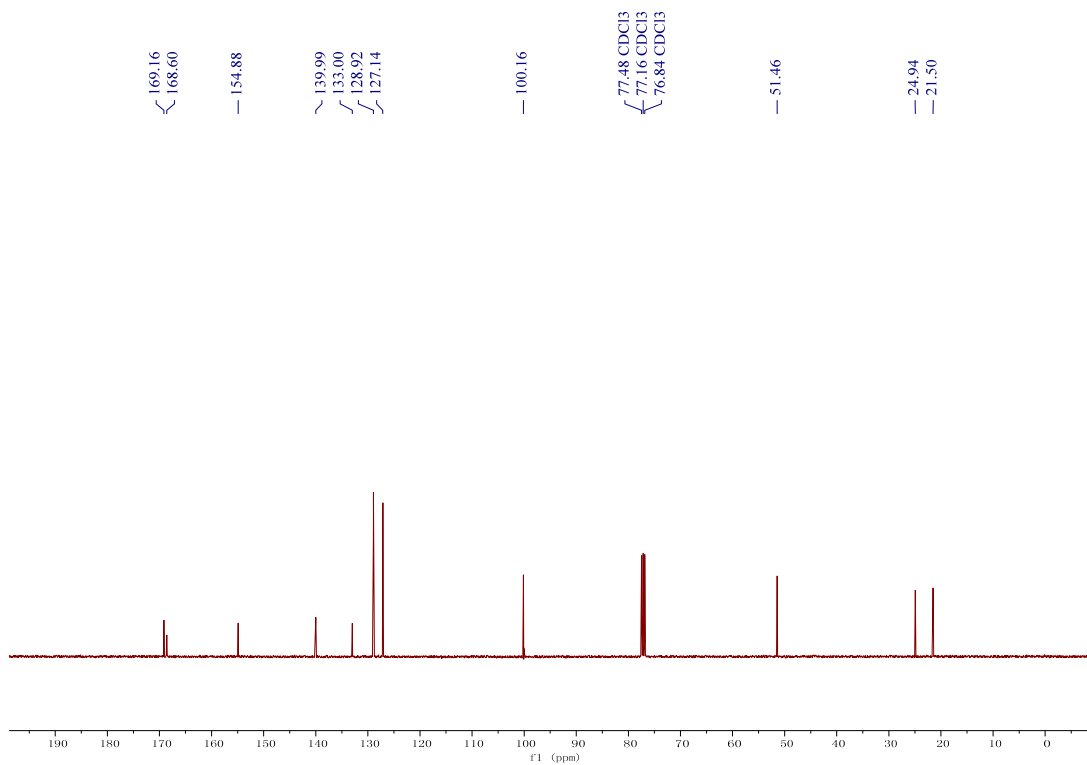

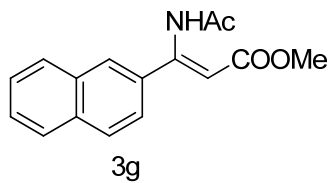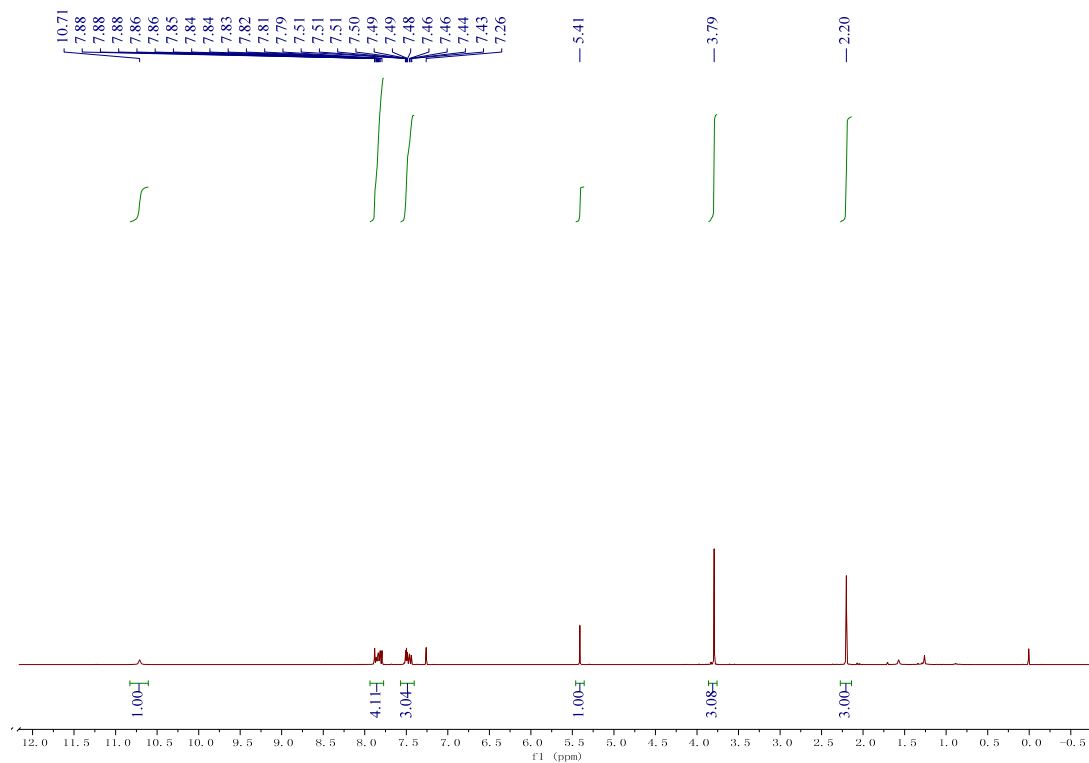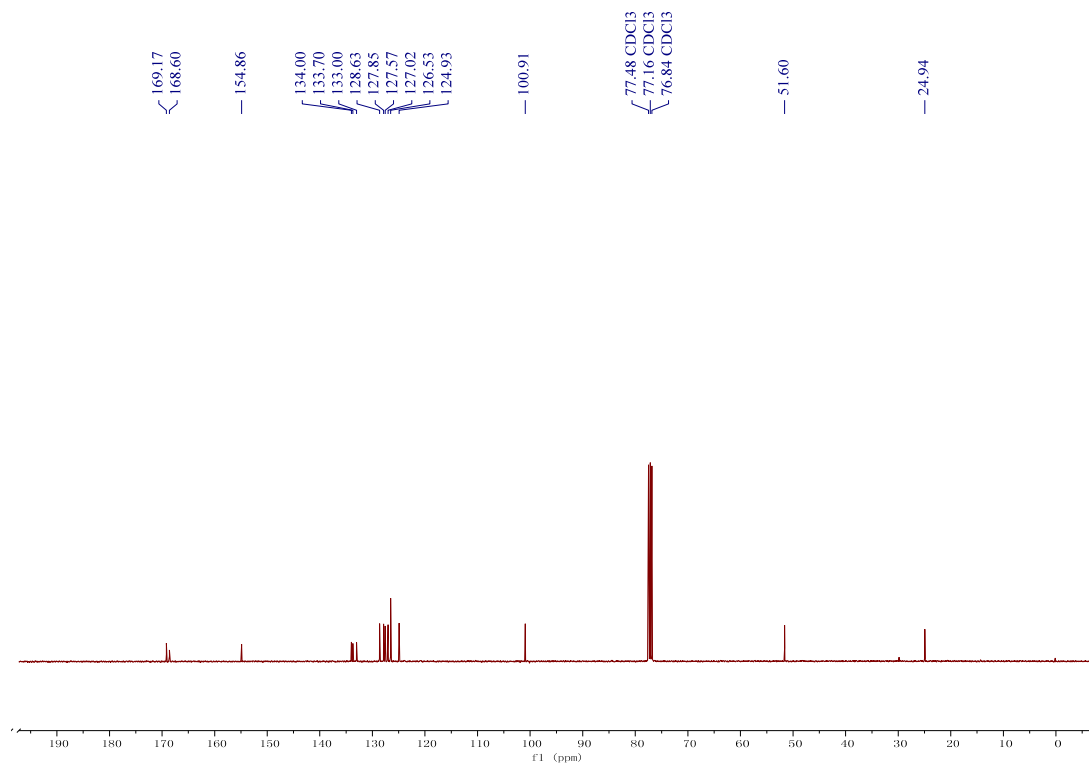

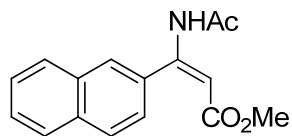

3g'

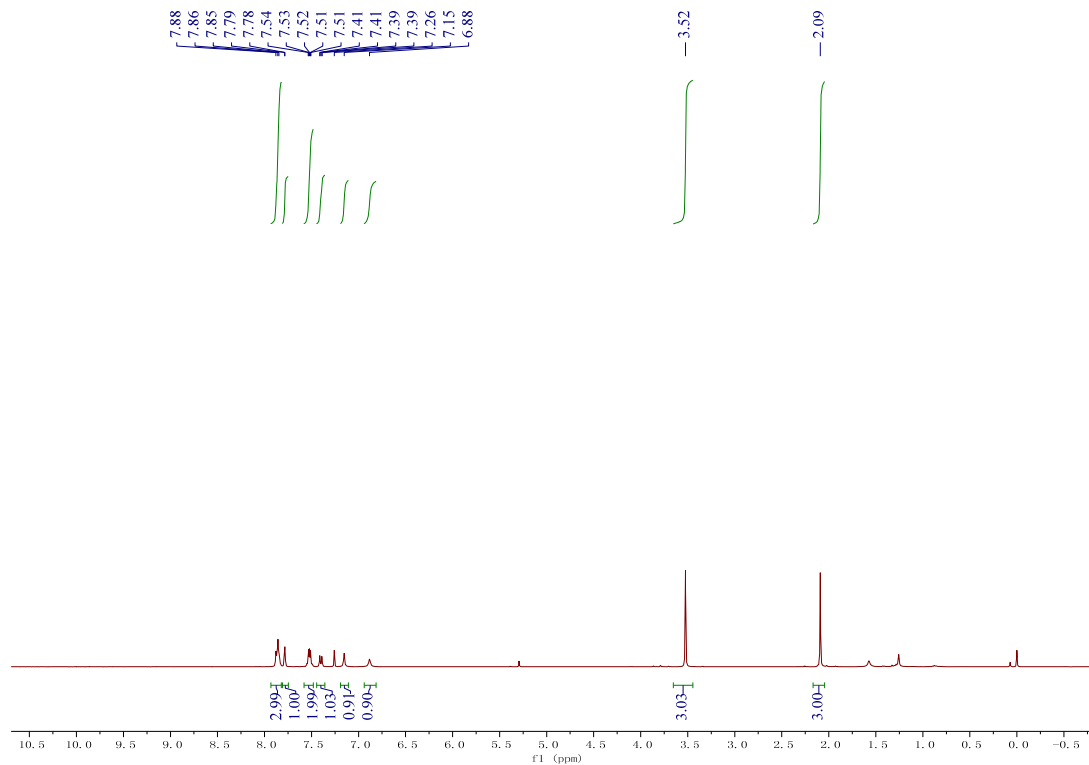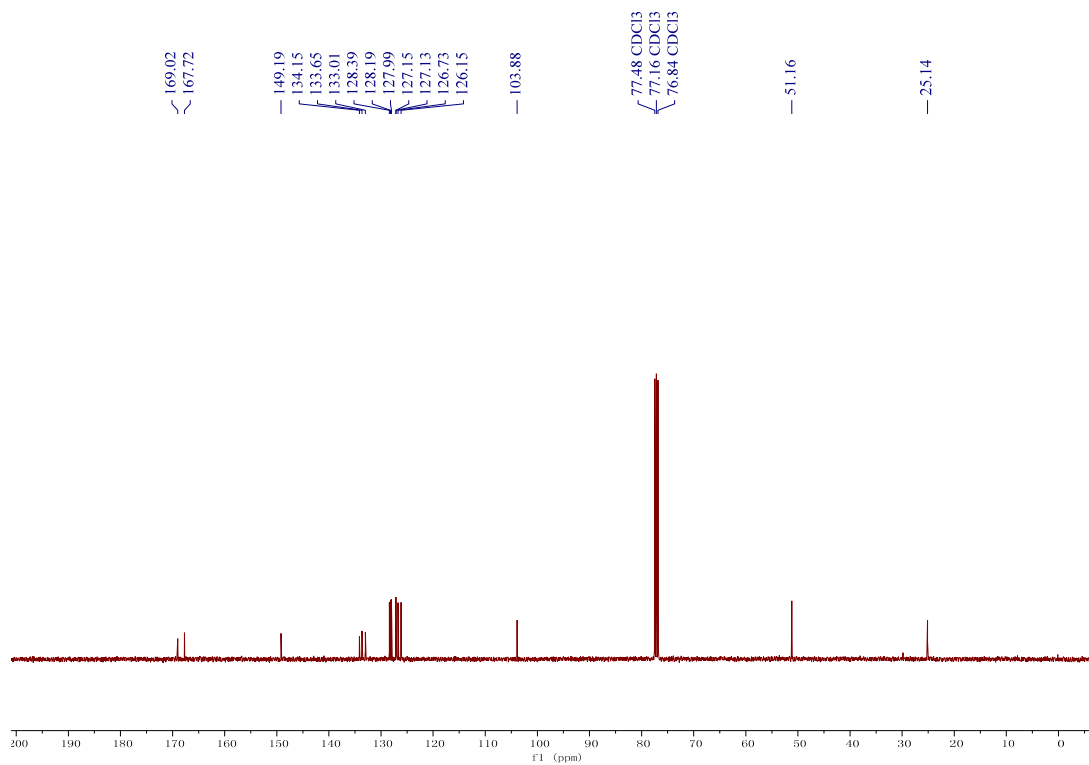

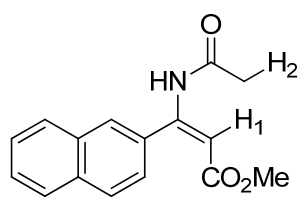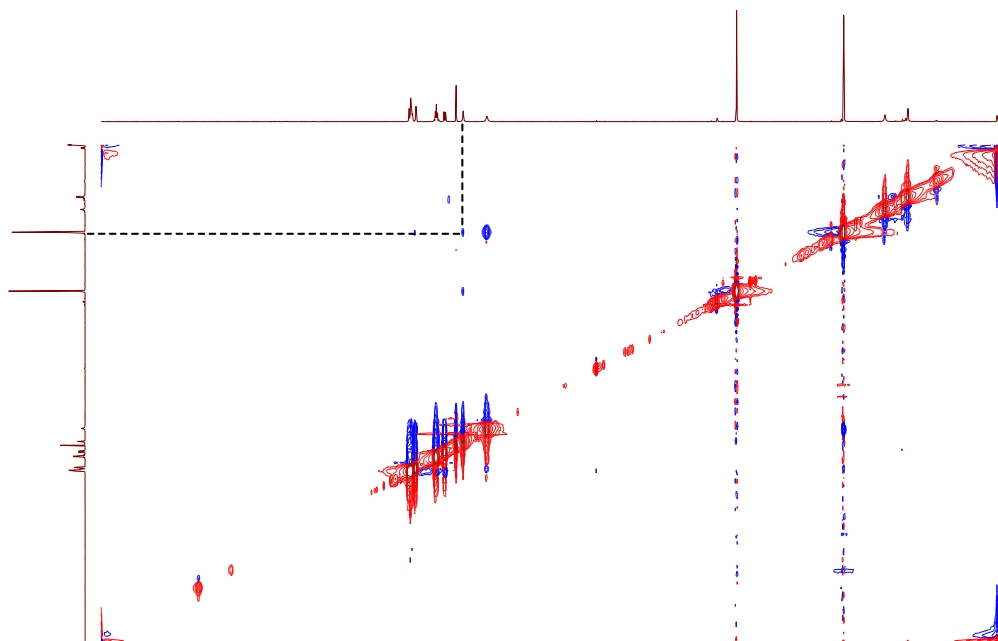



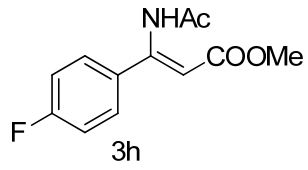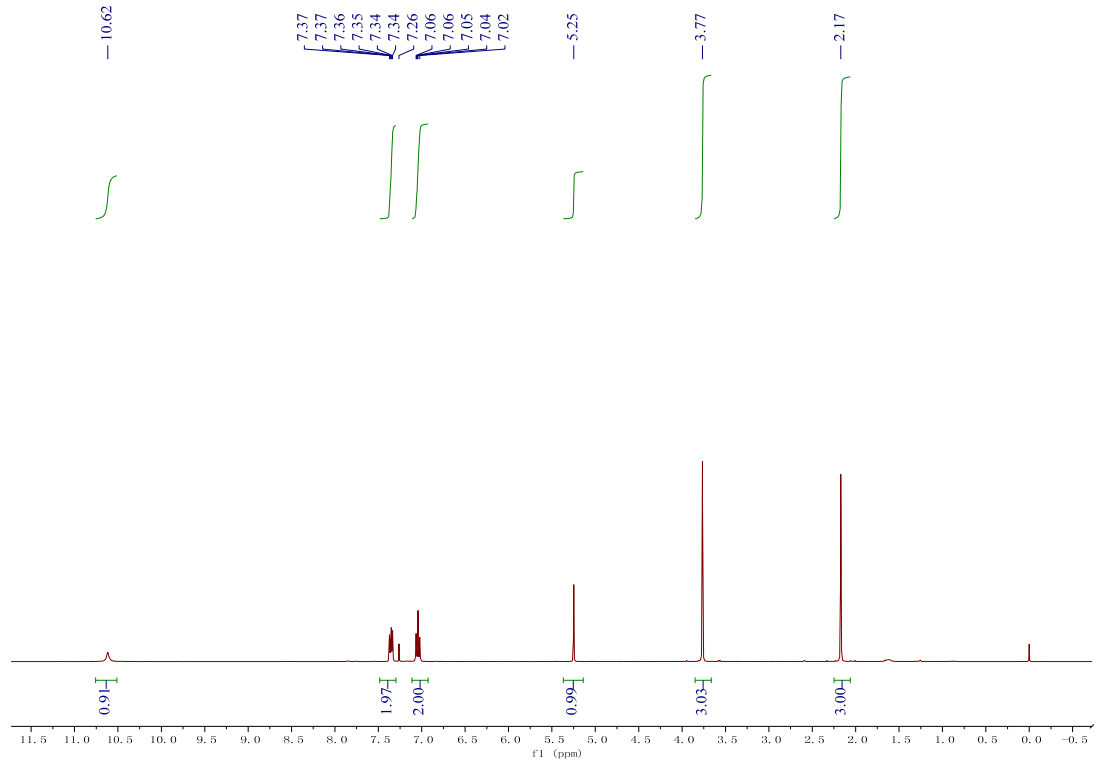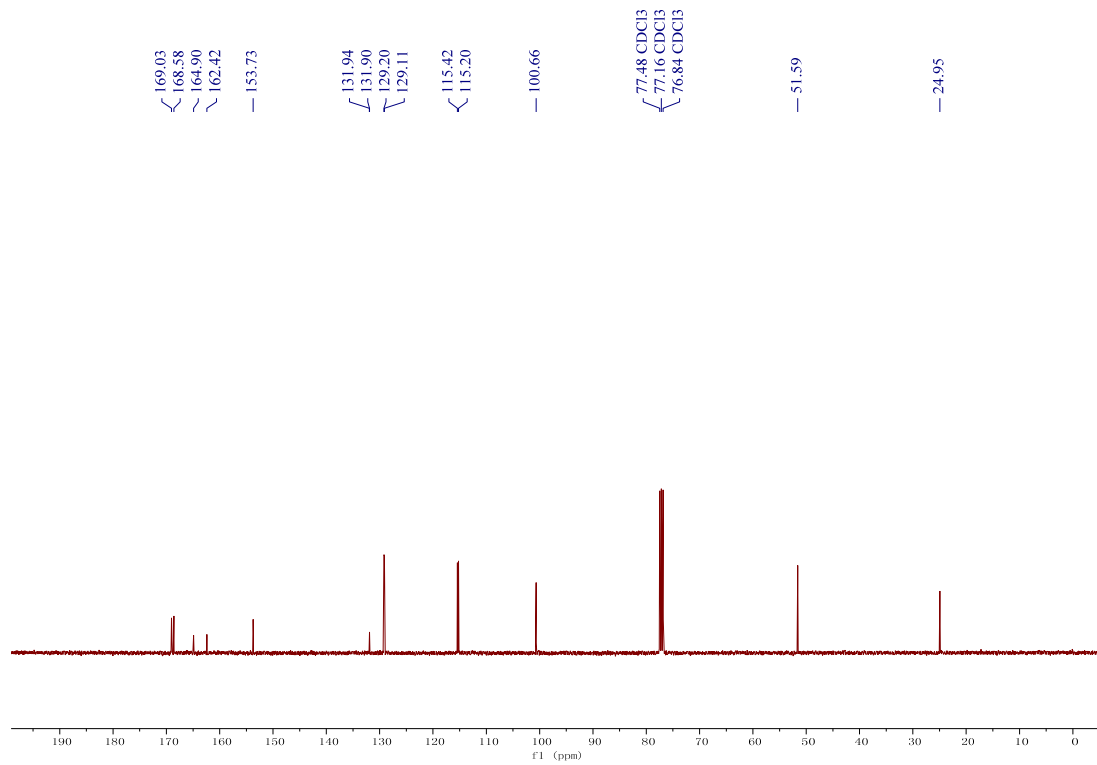

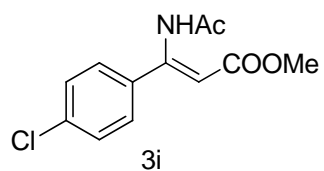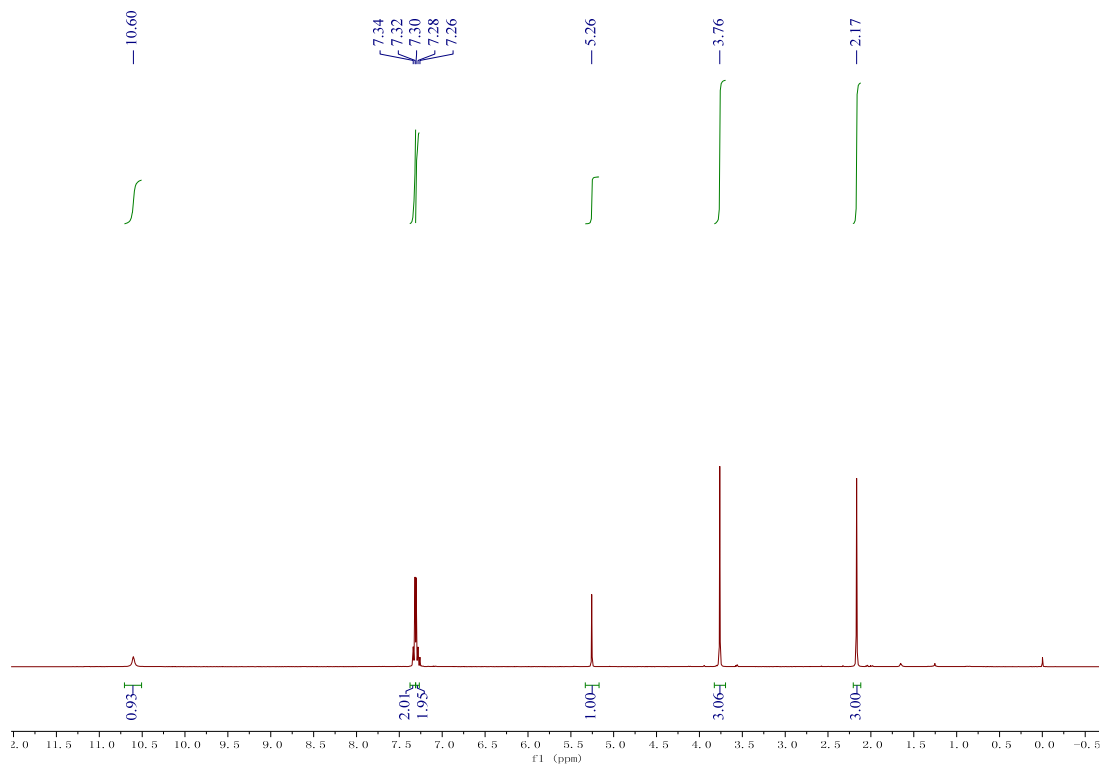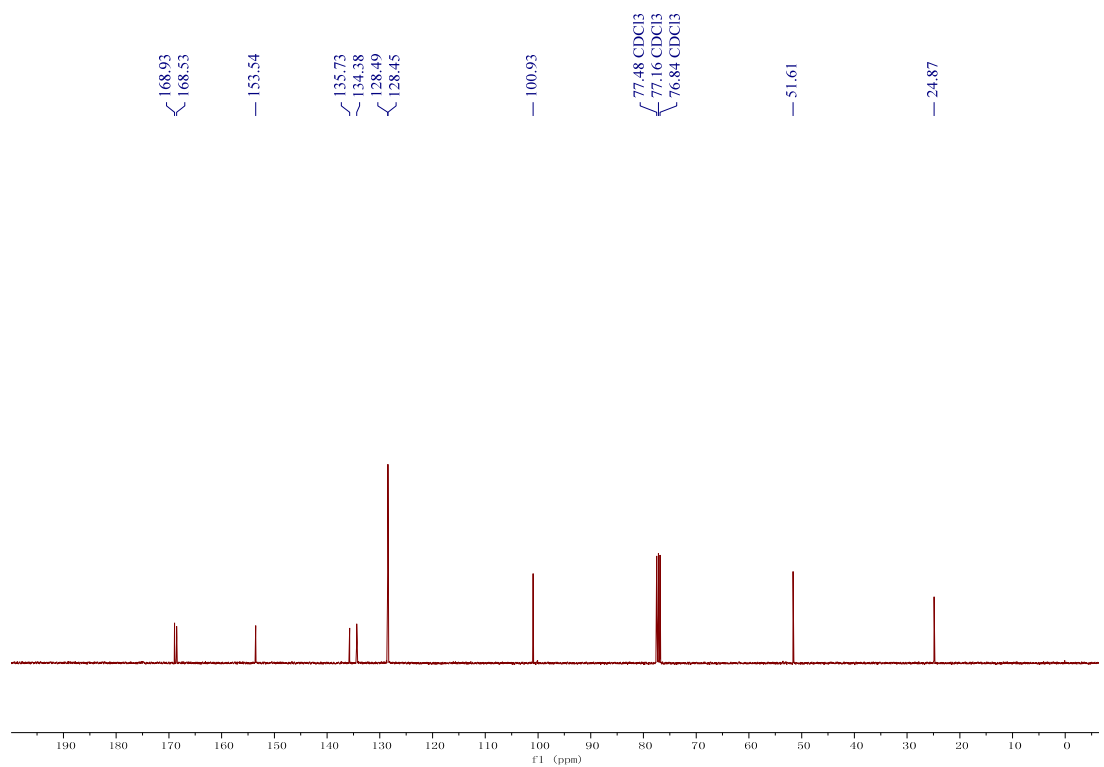

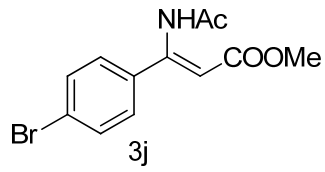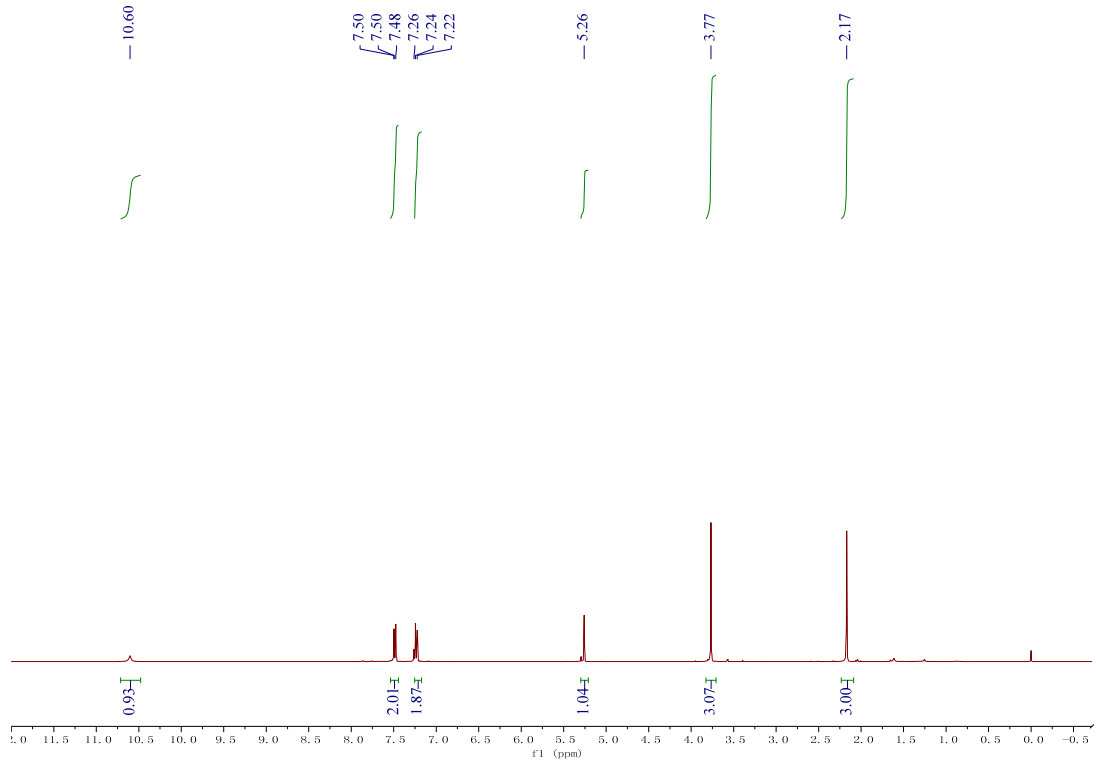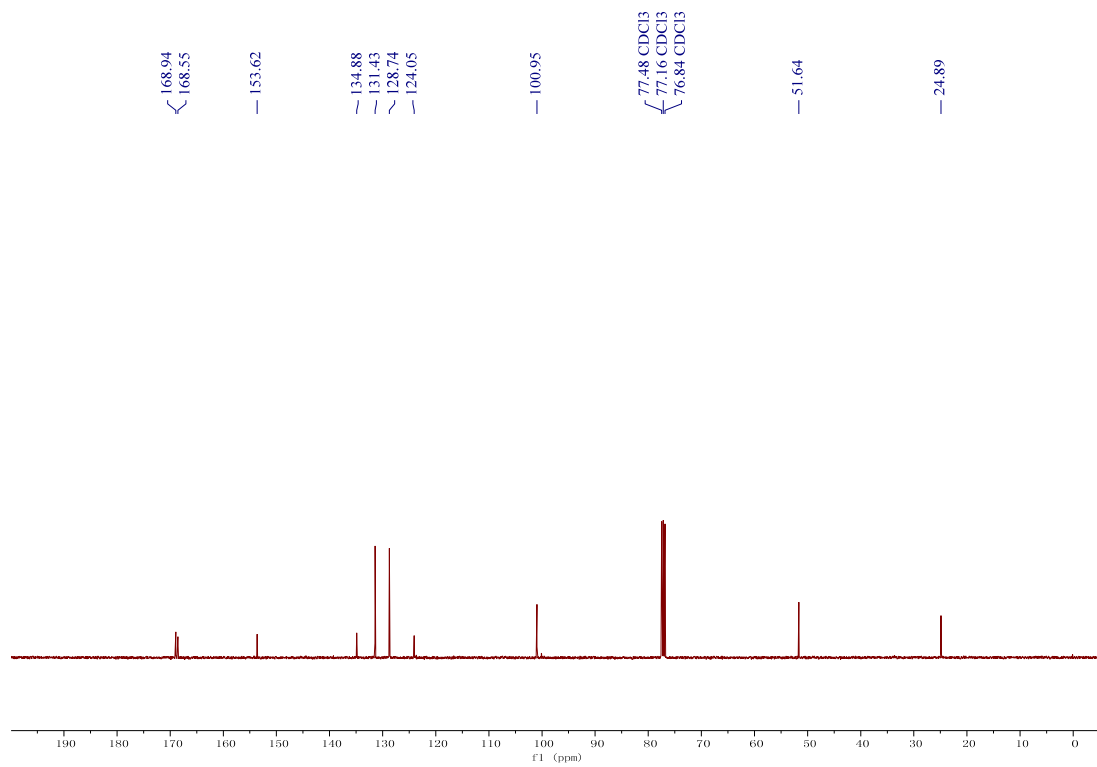

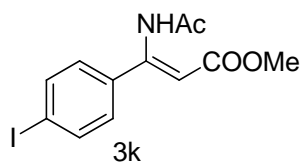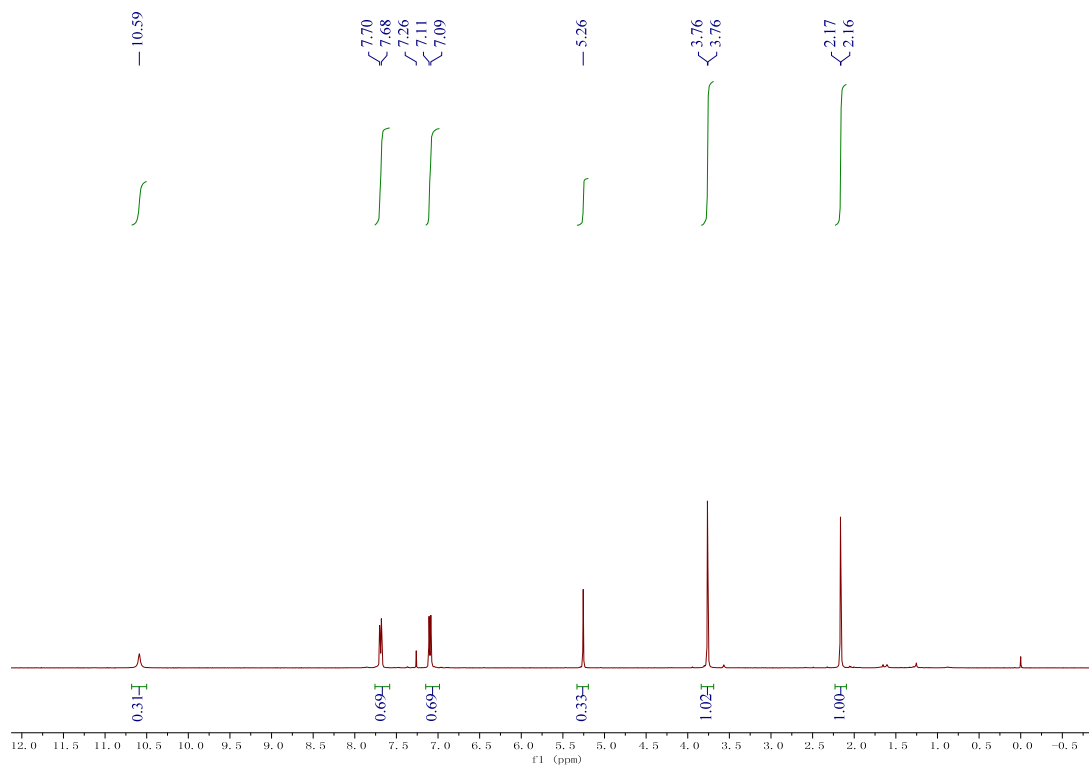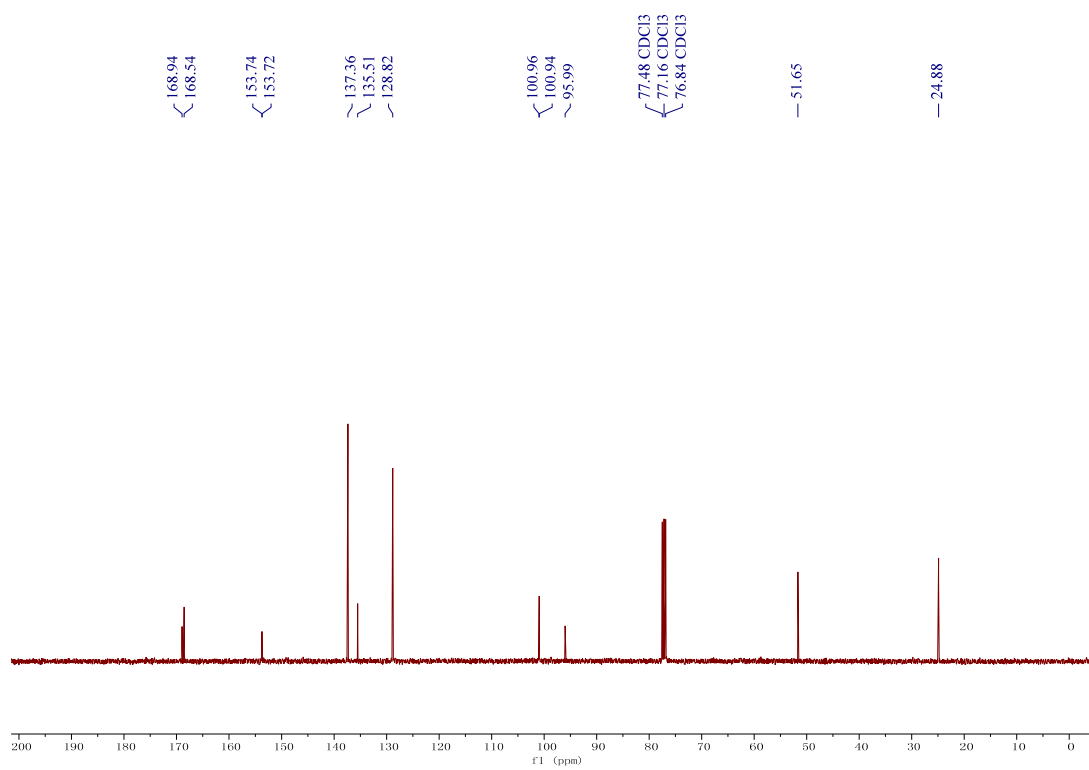

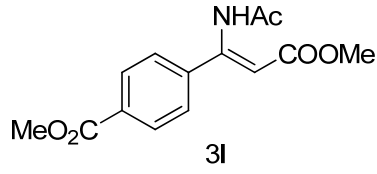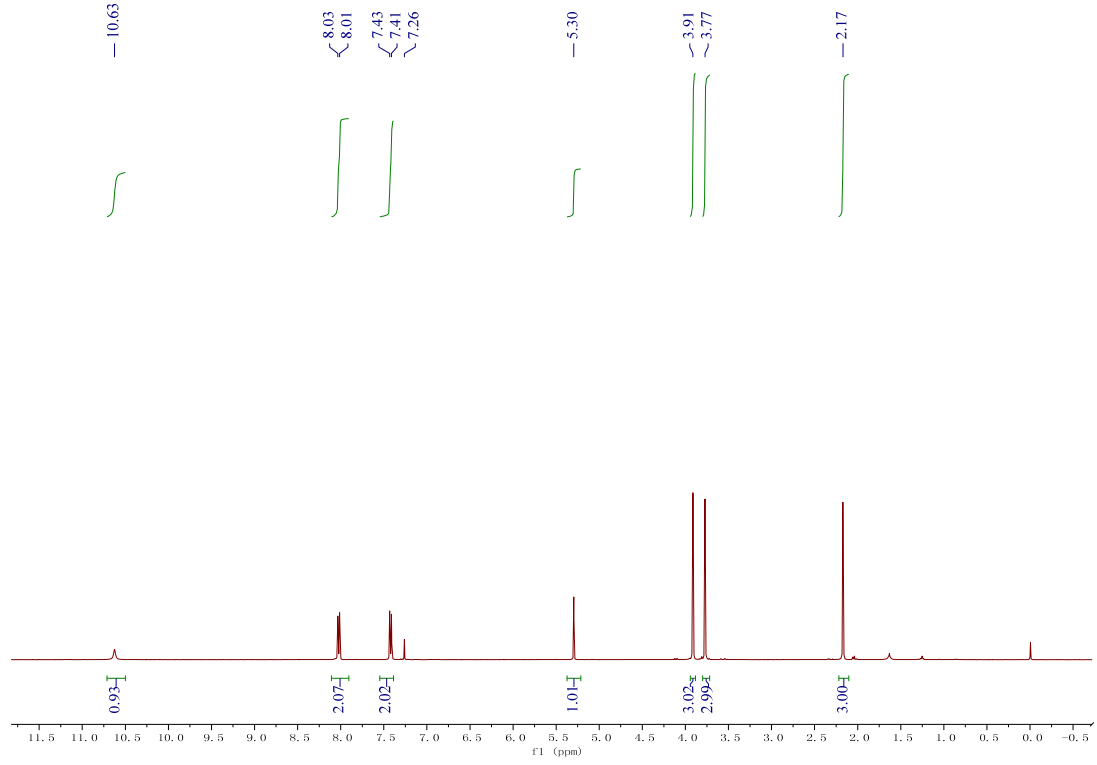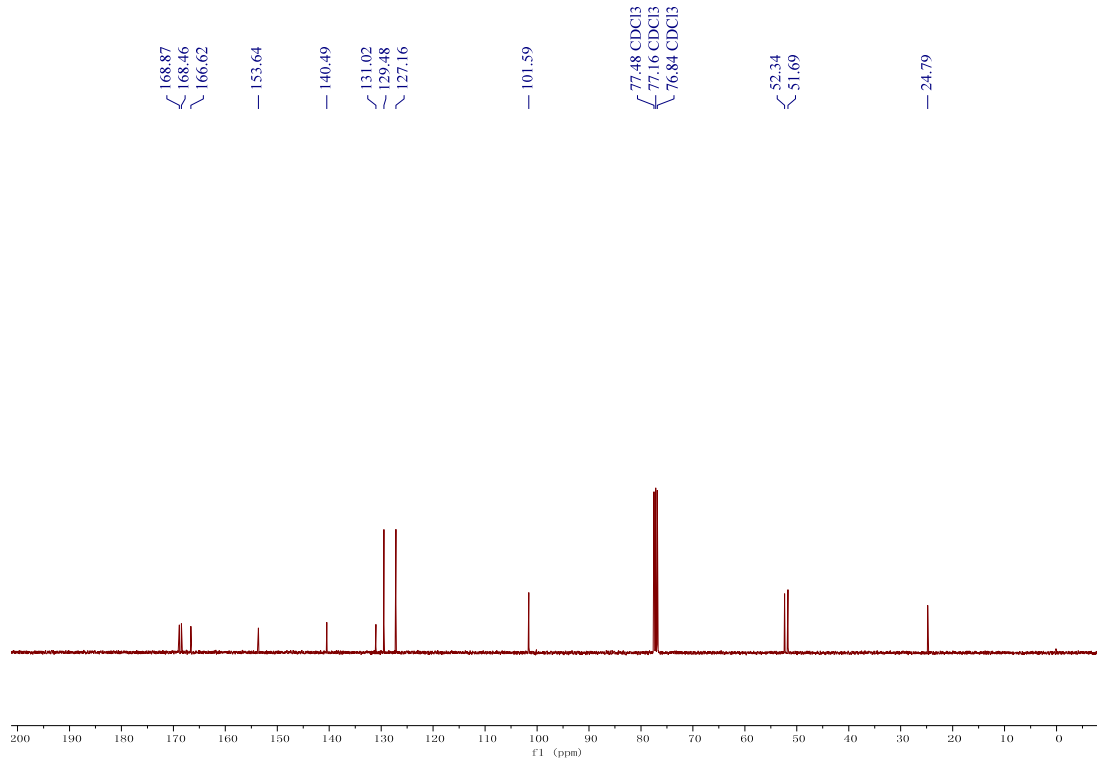

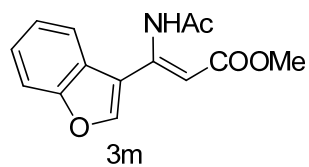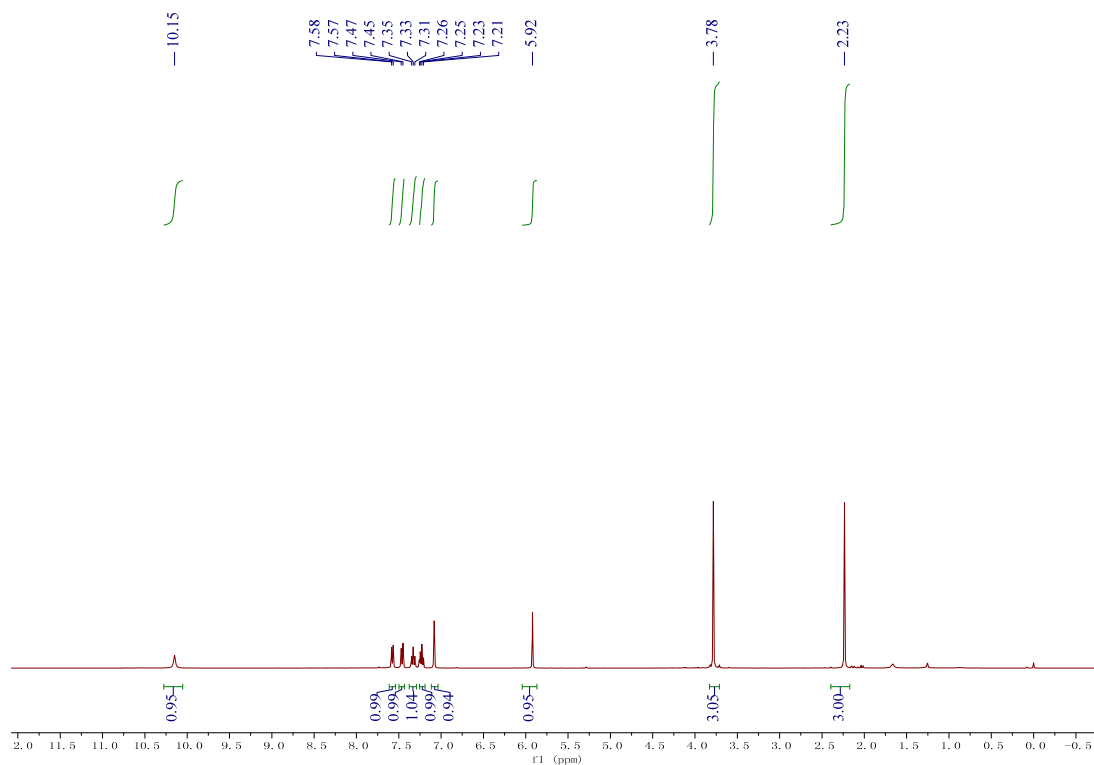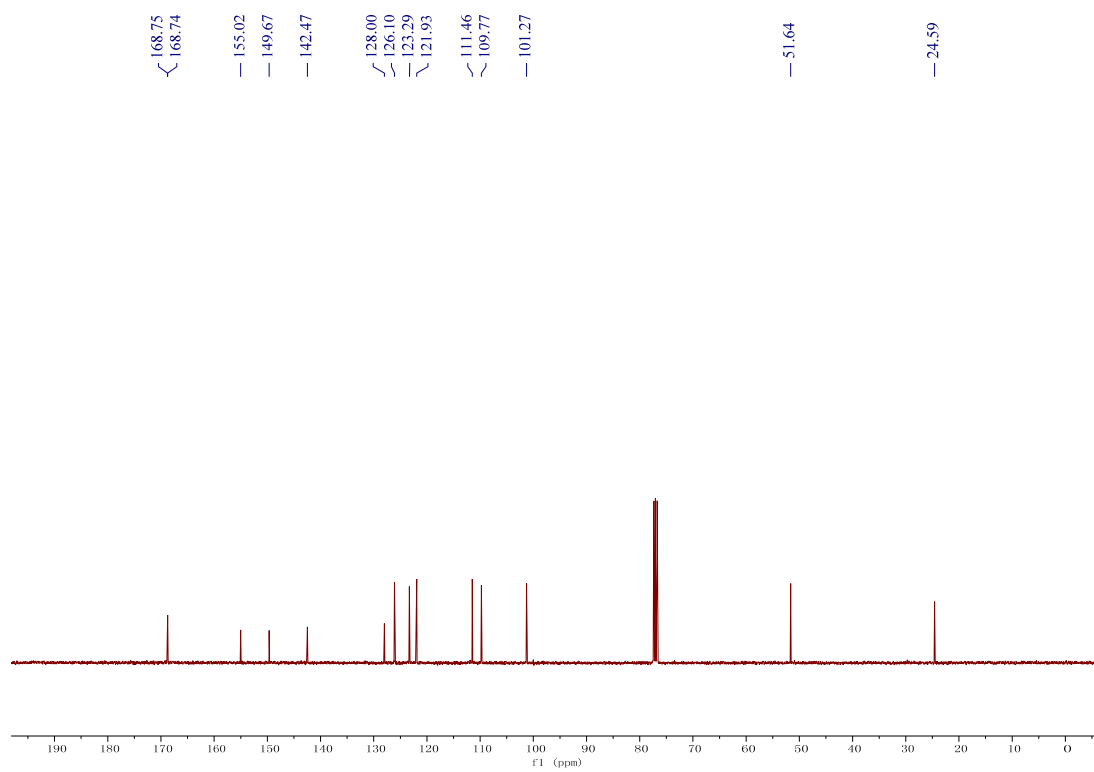

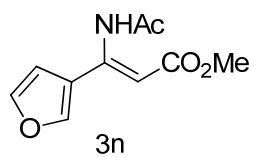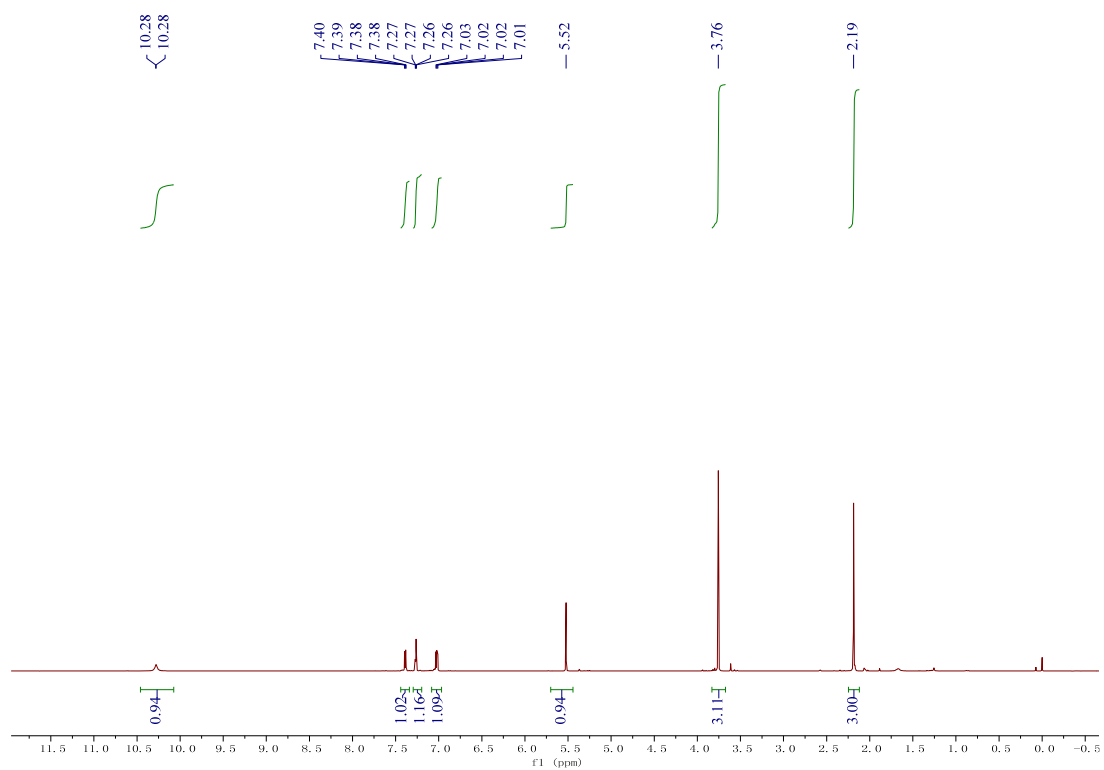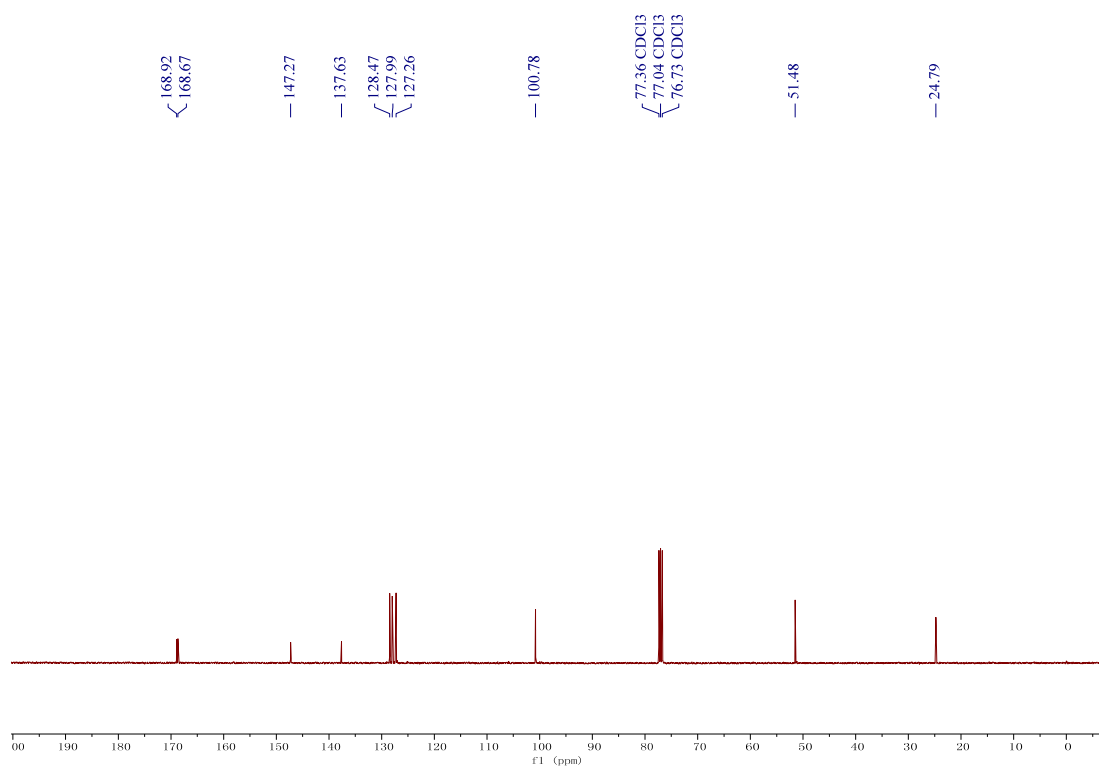

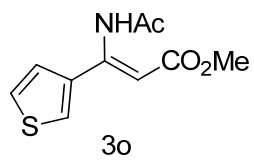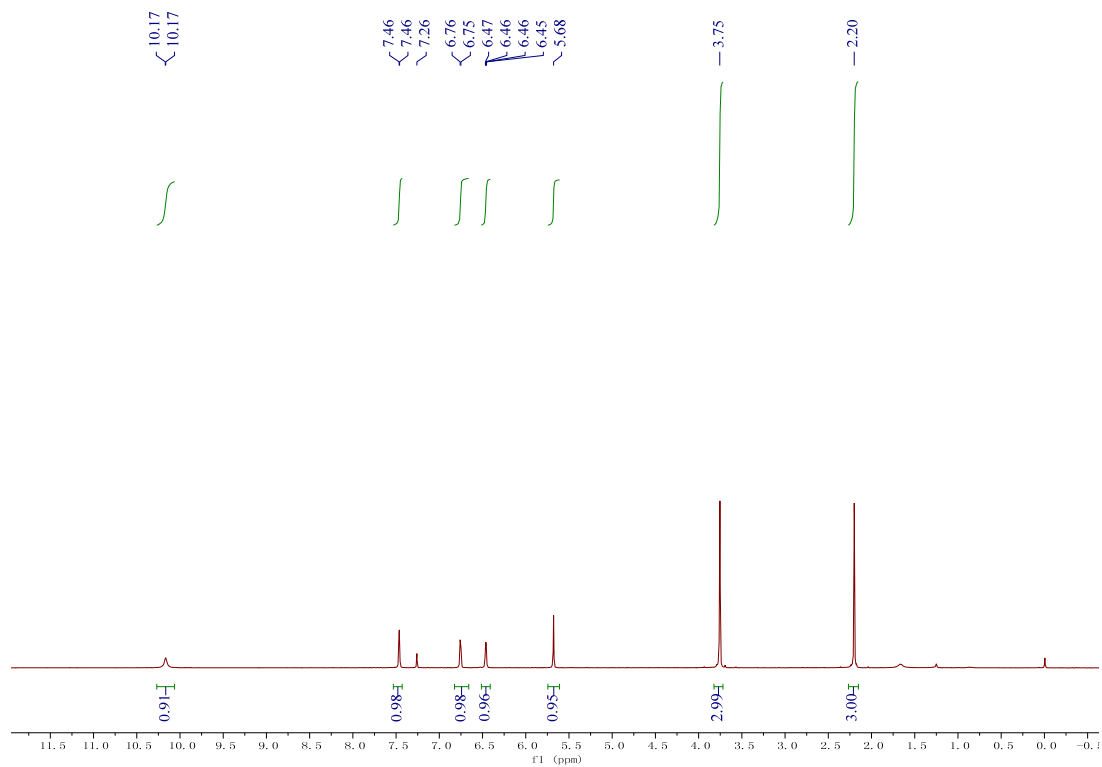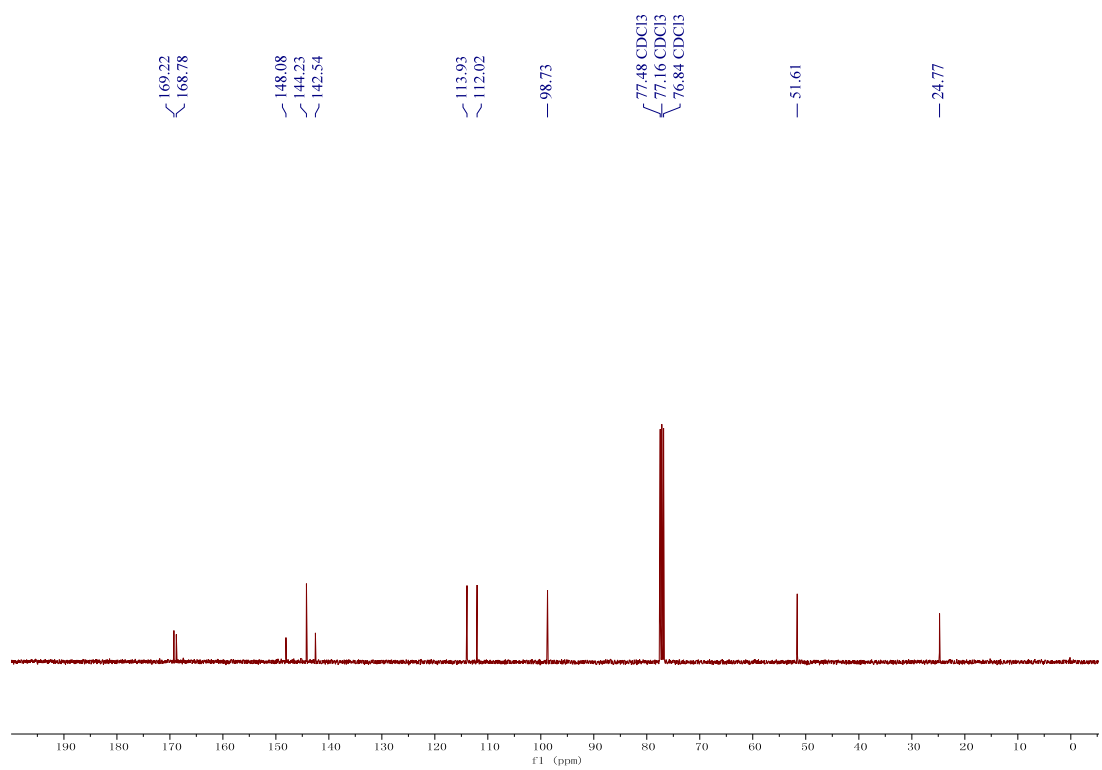



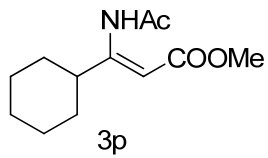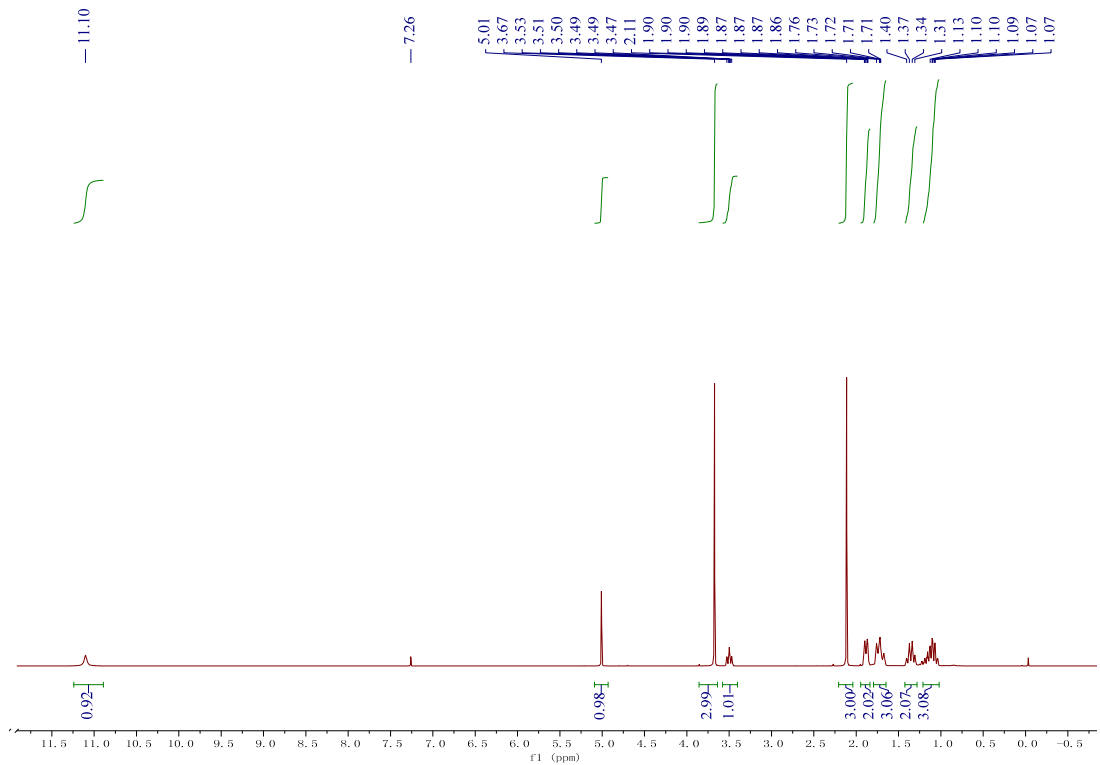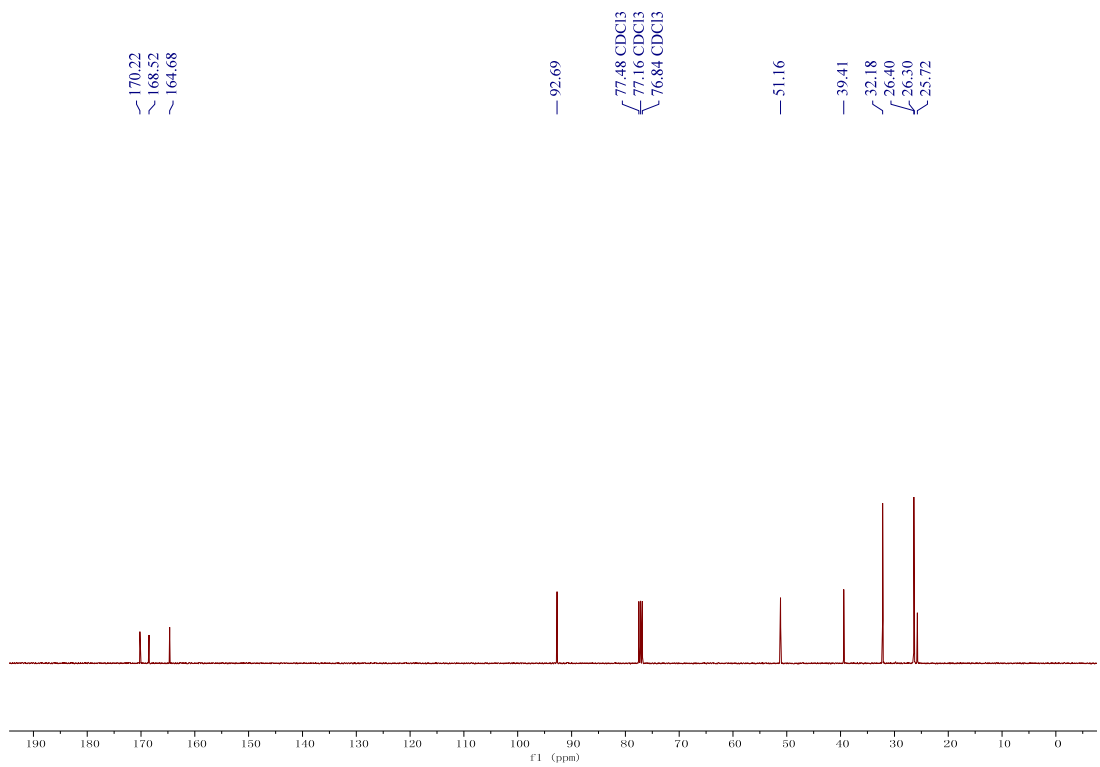

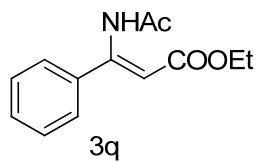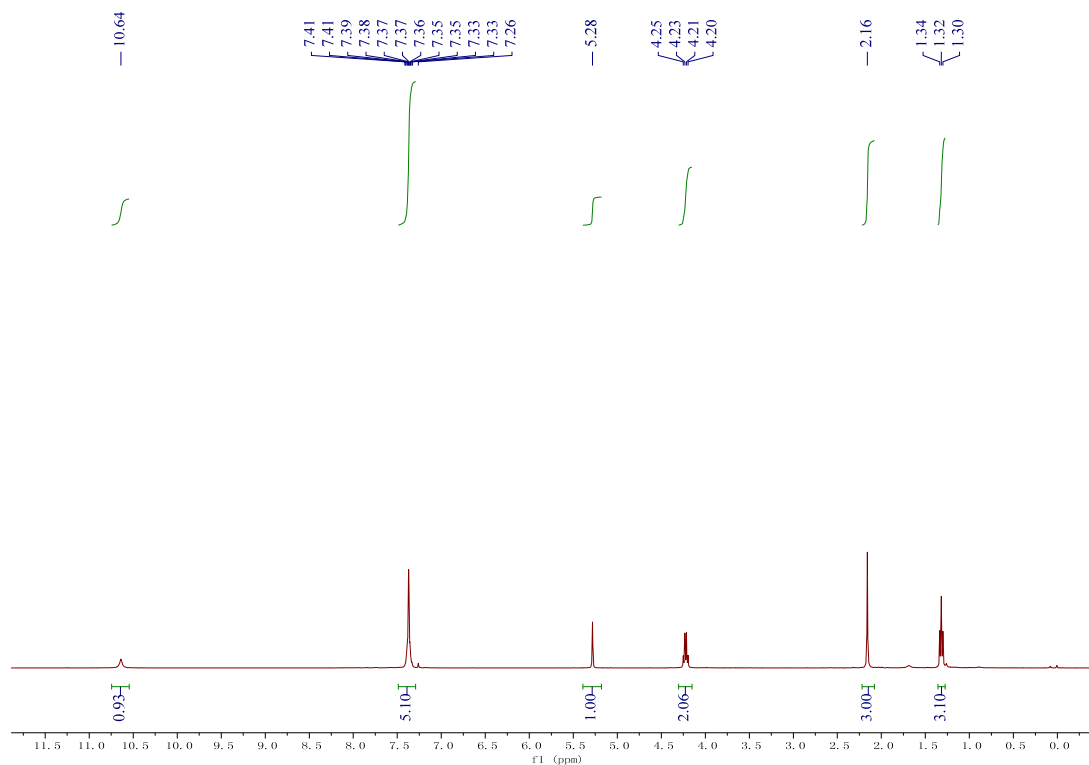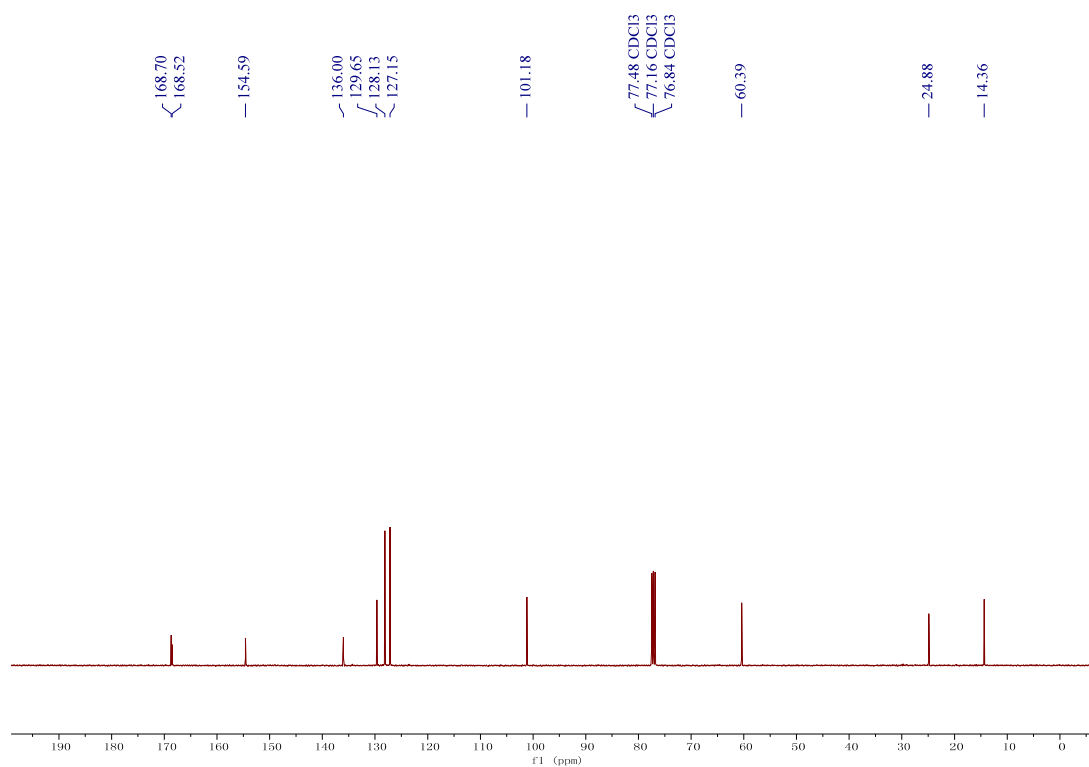

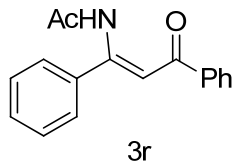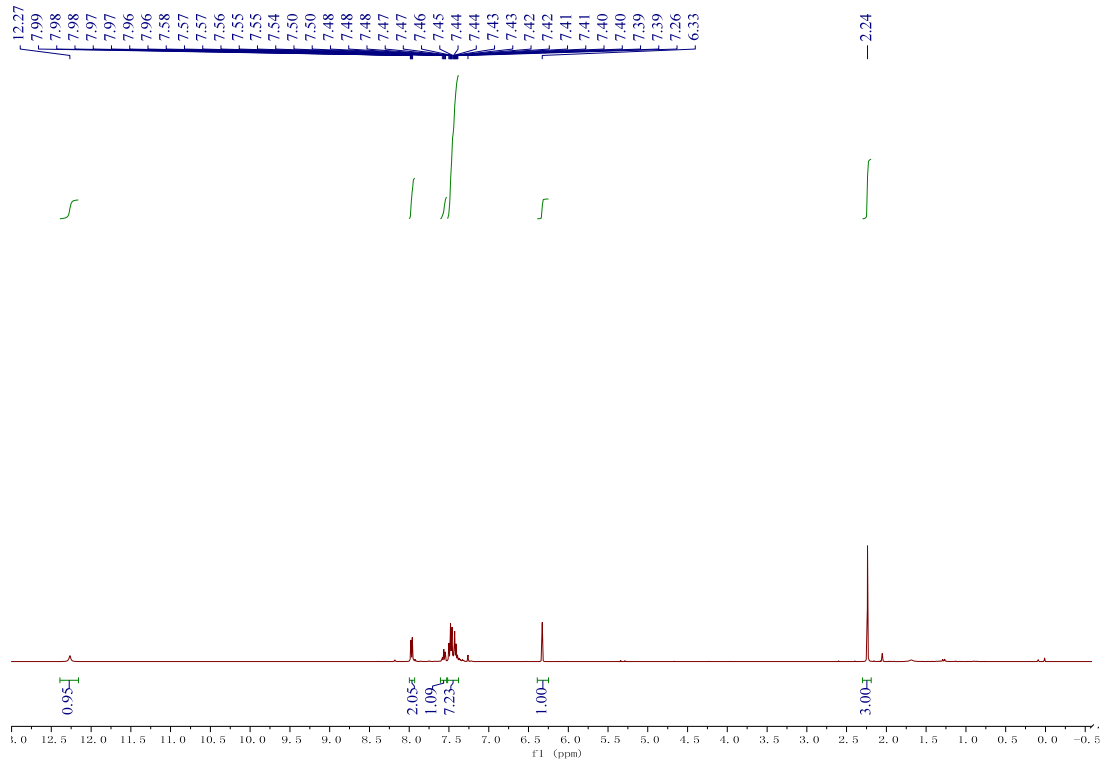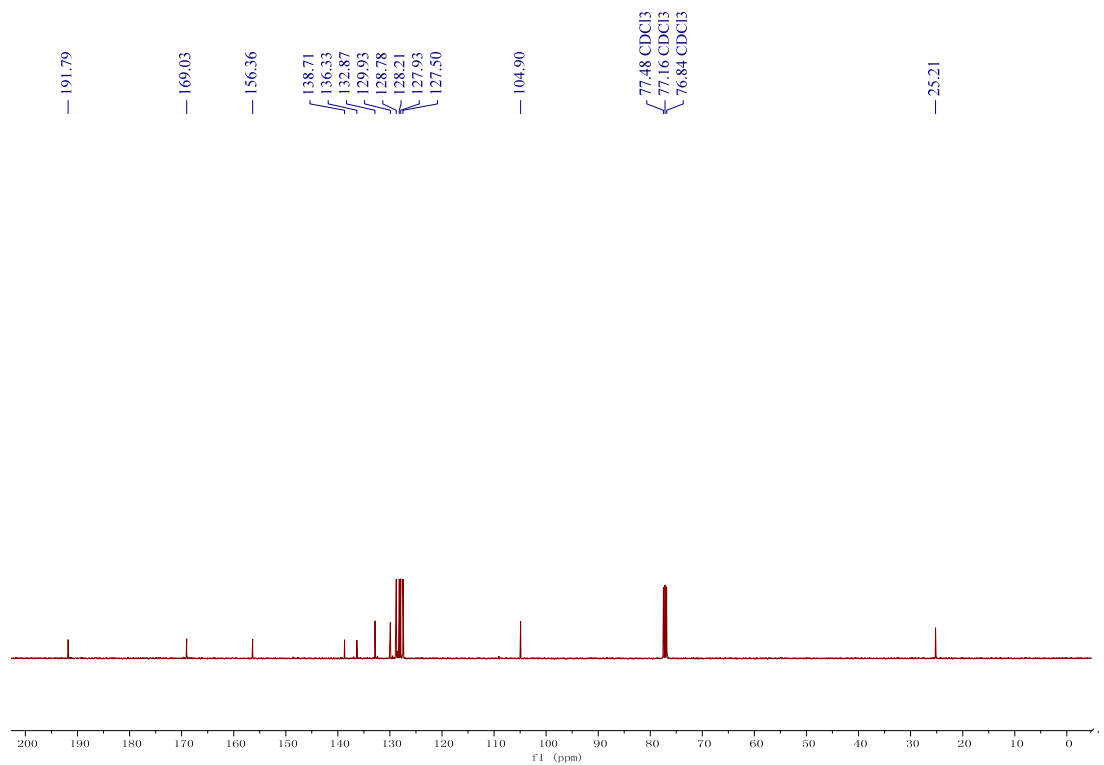

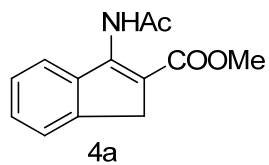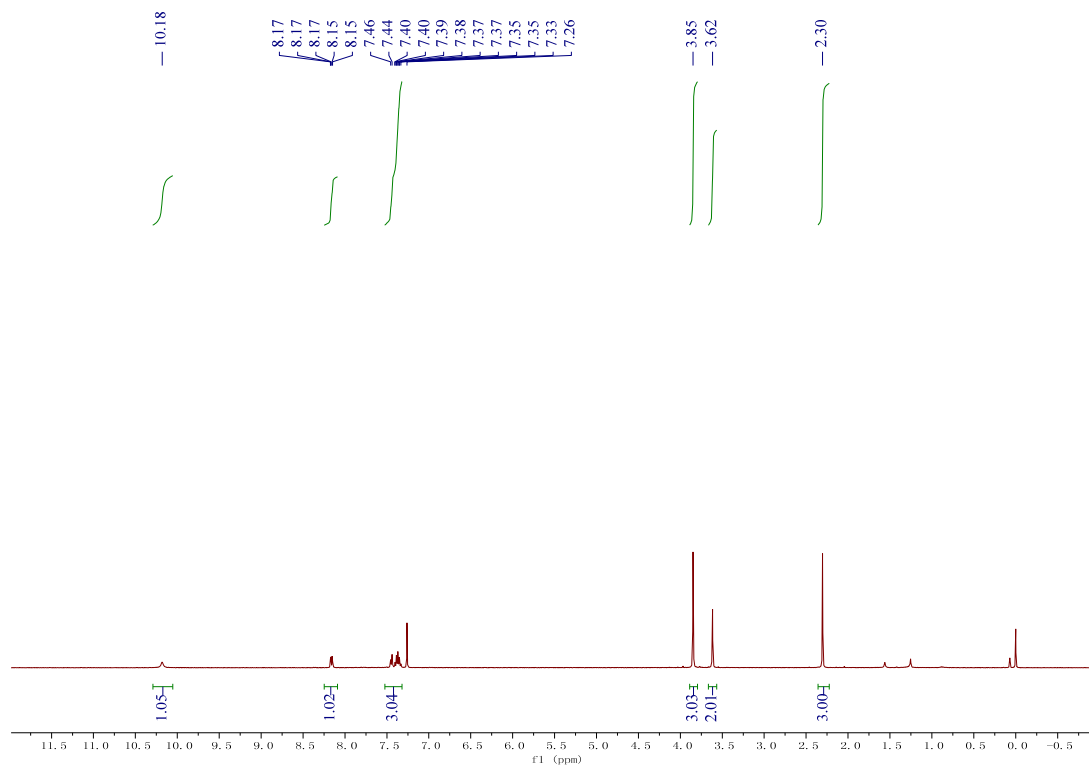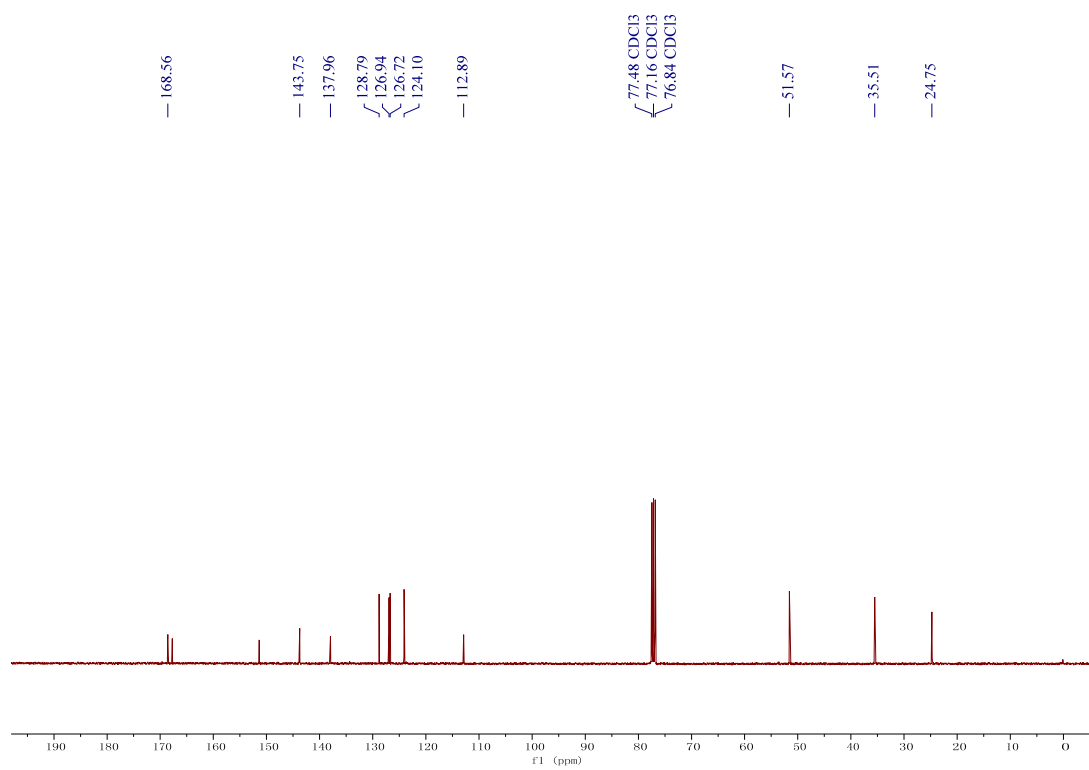

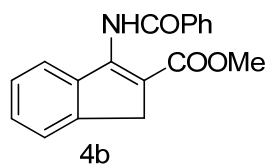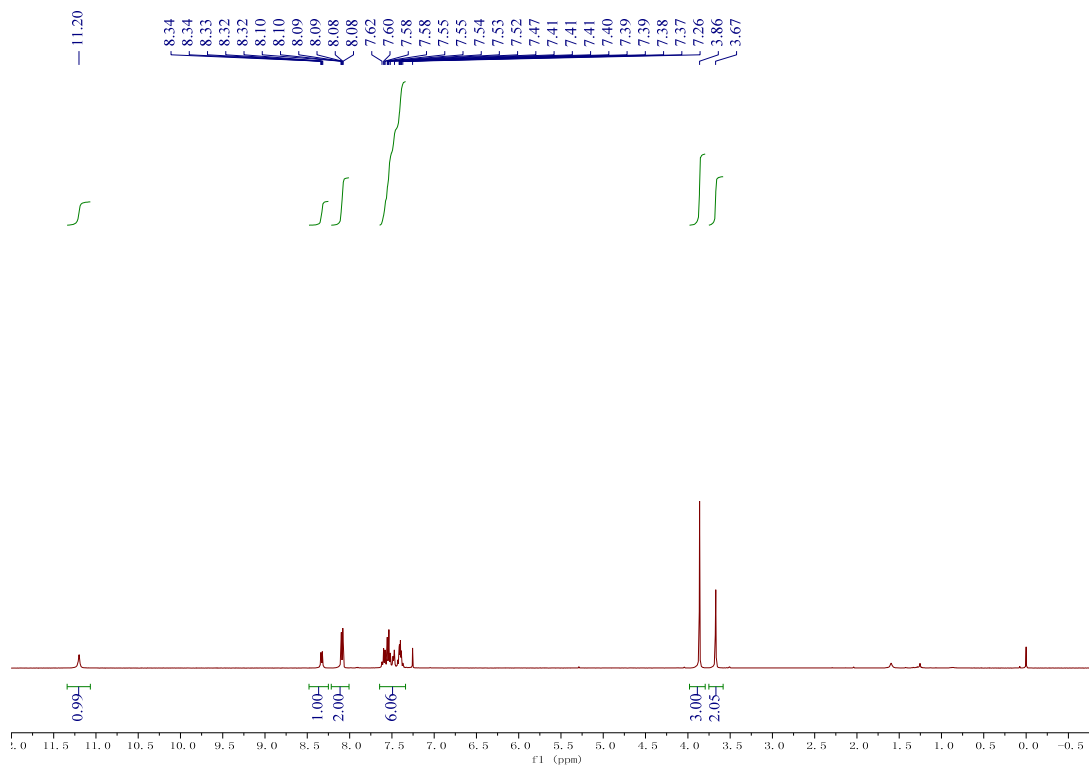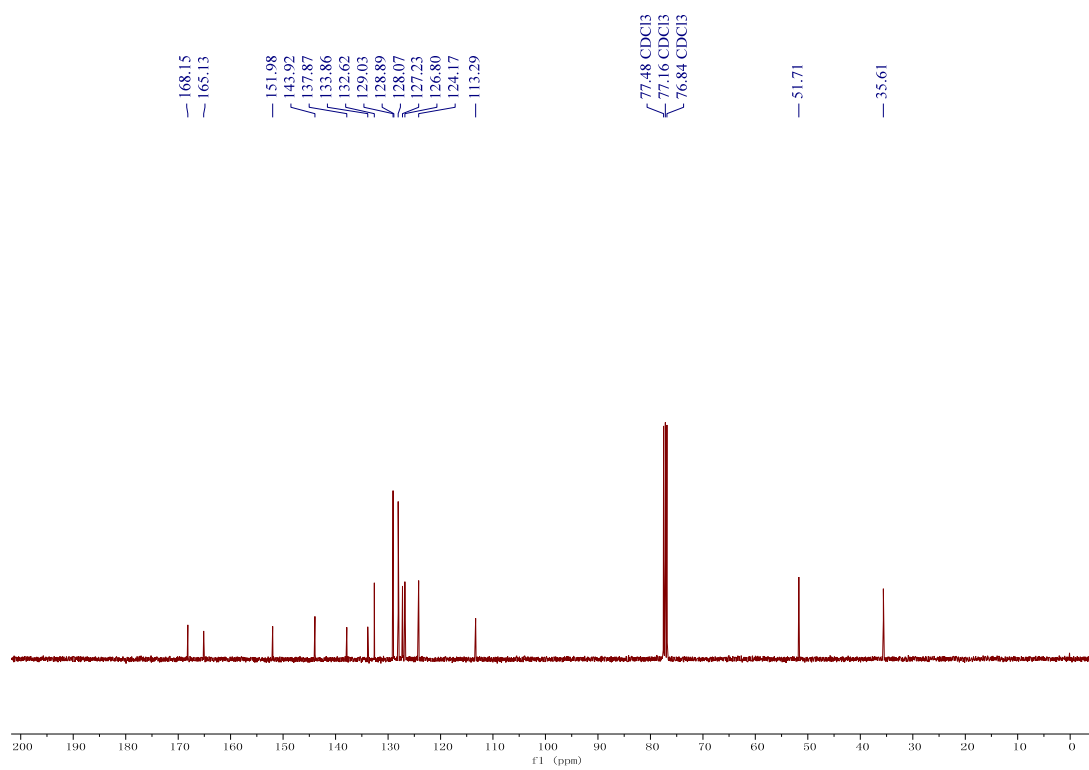

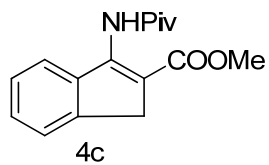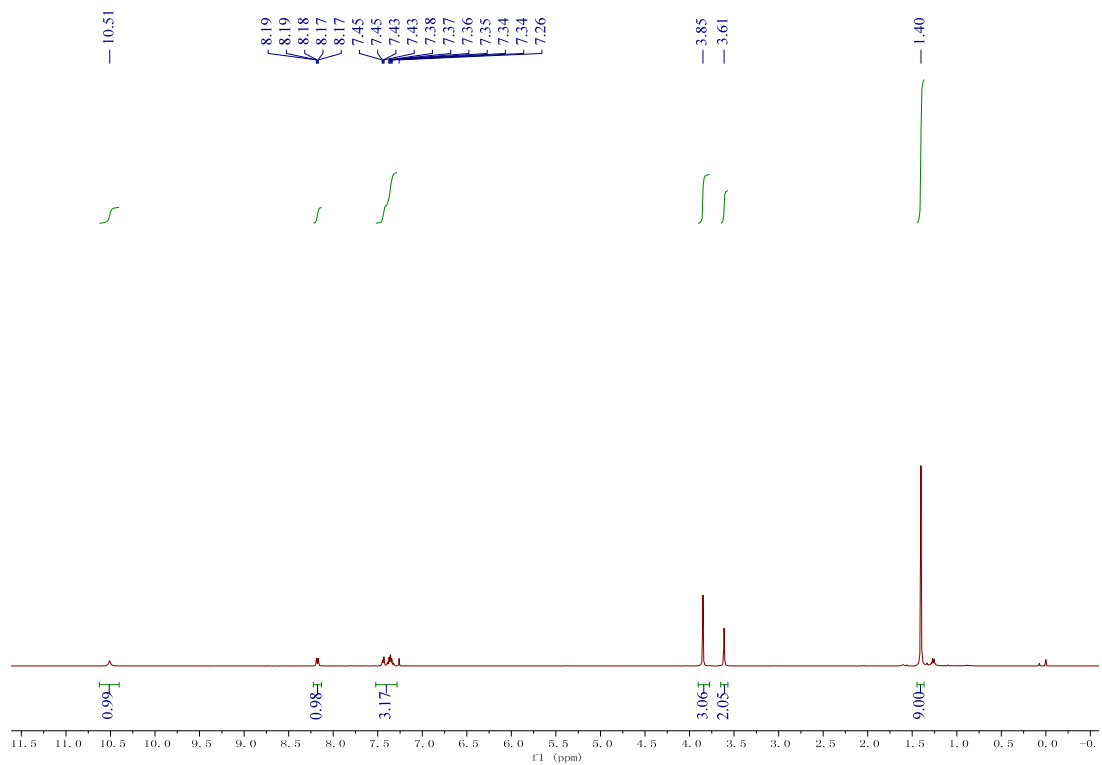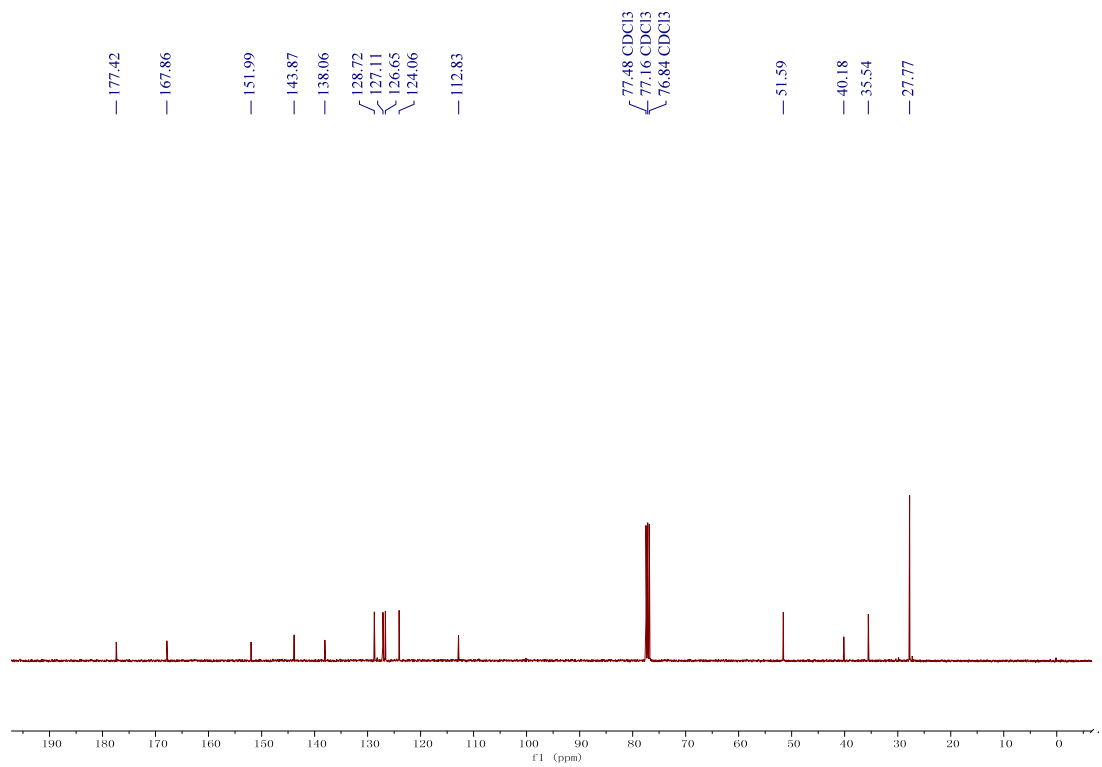

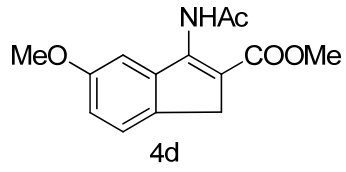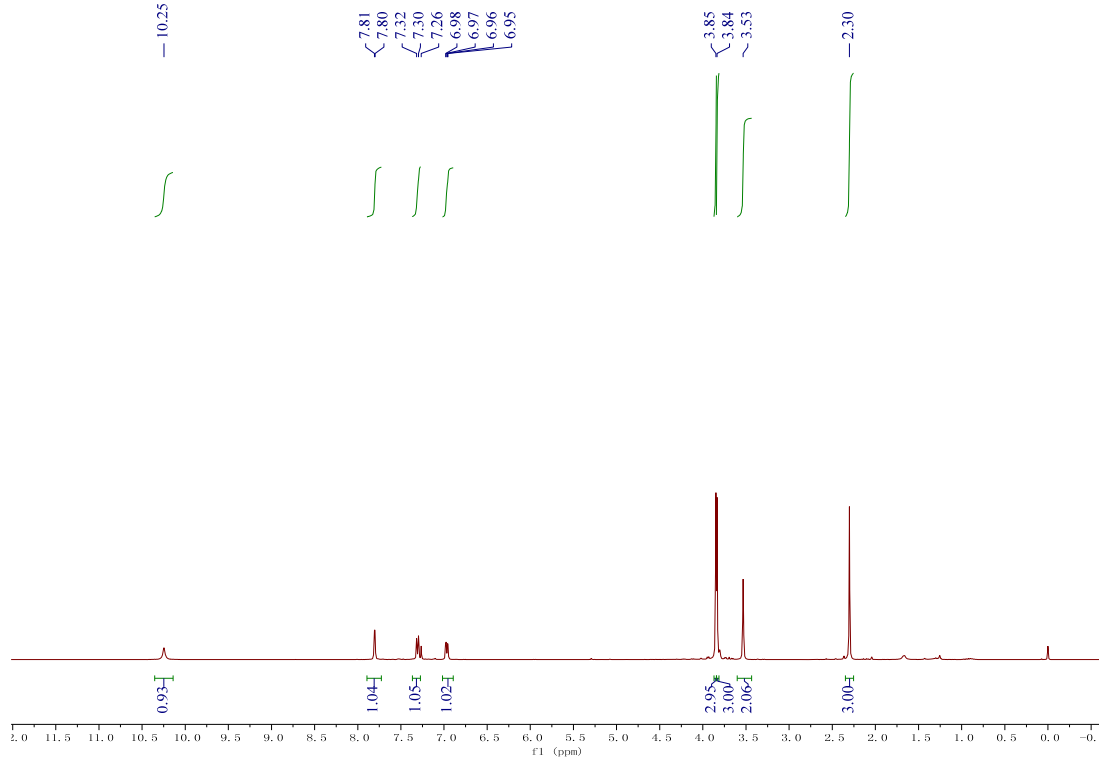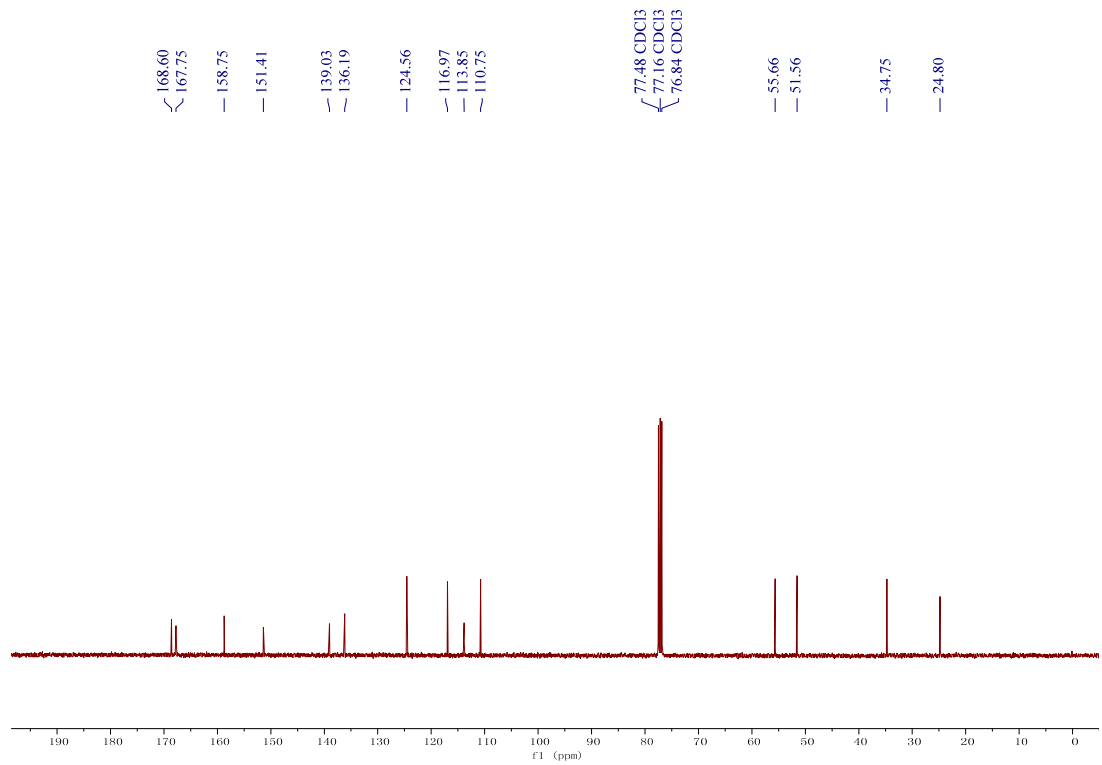

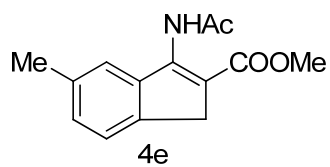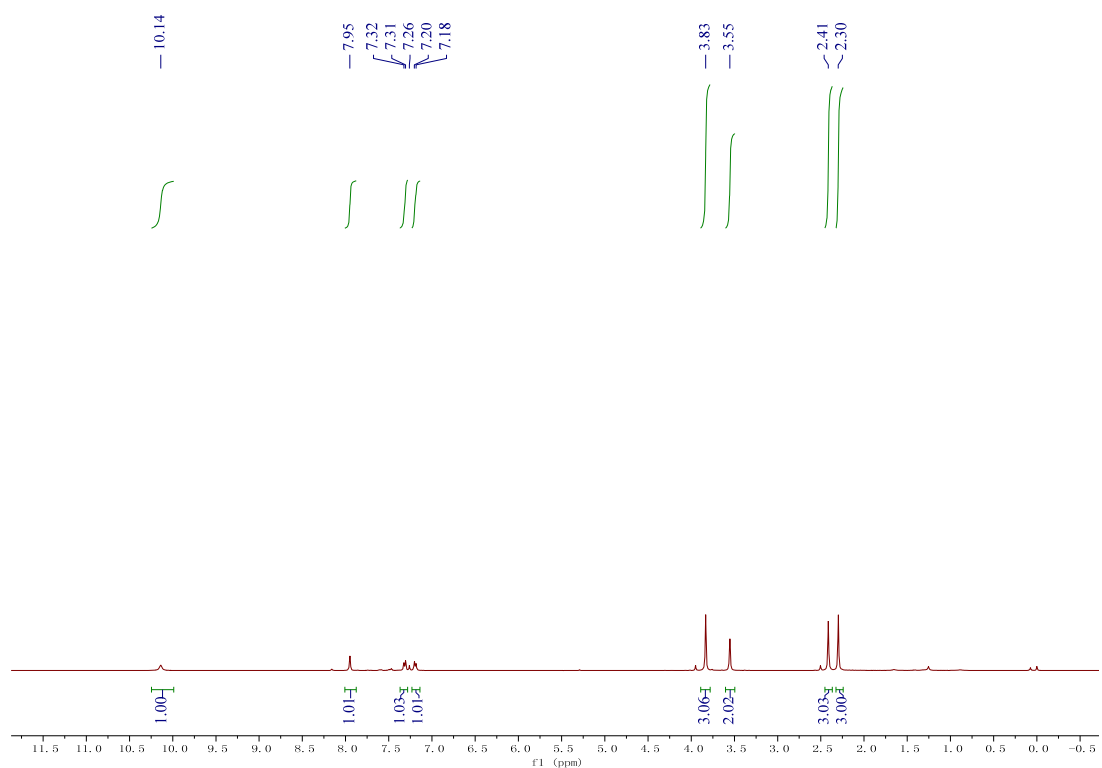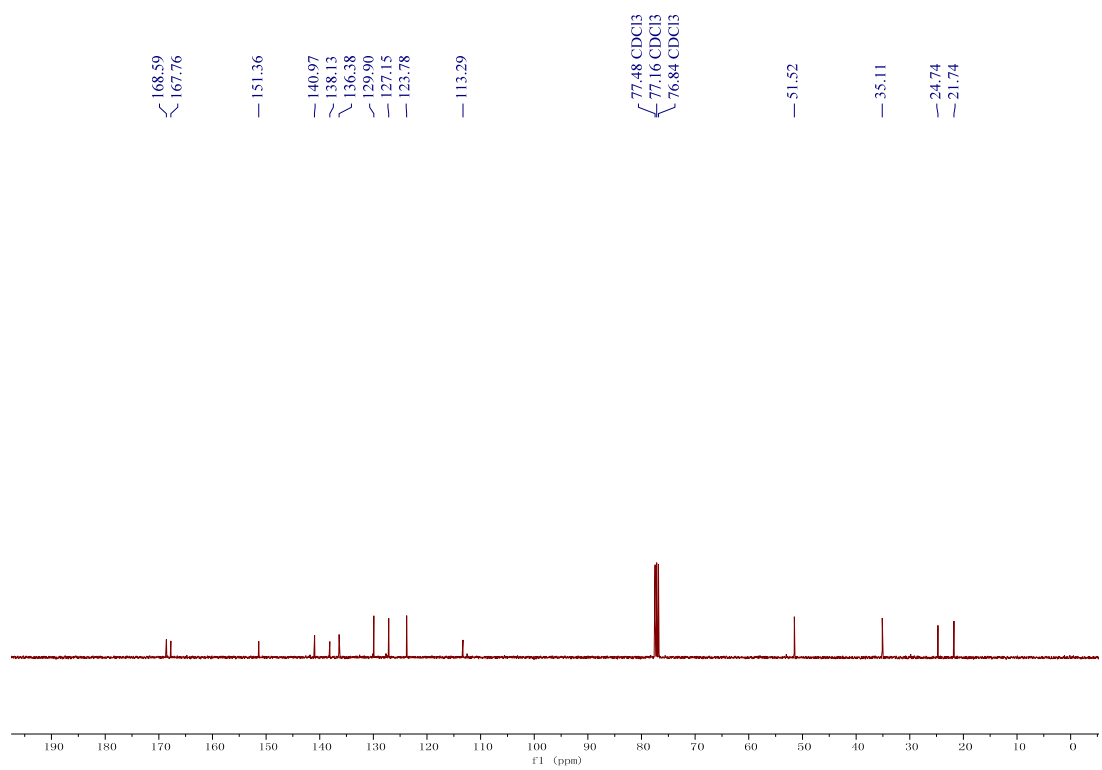



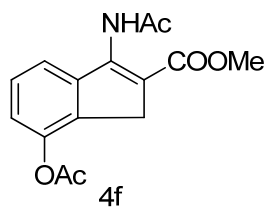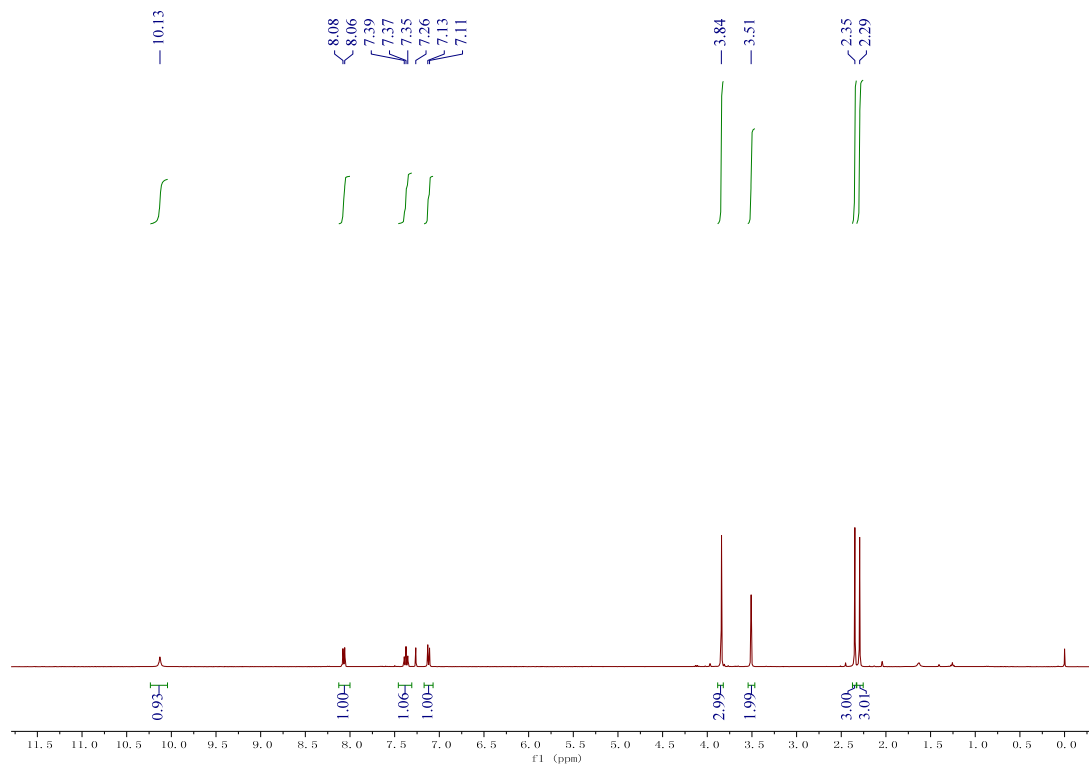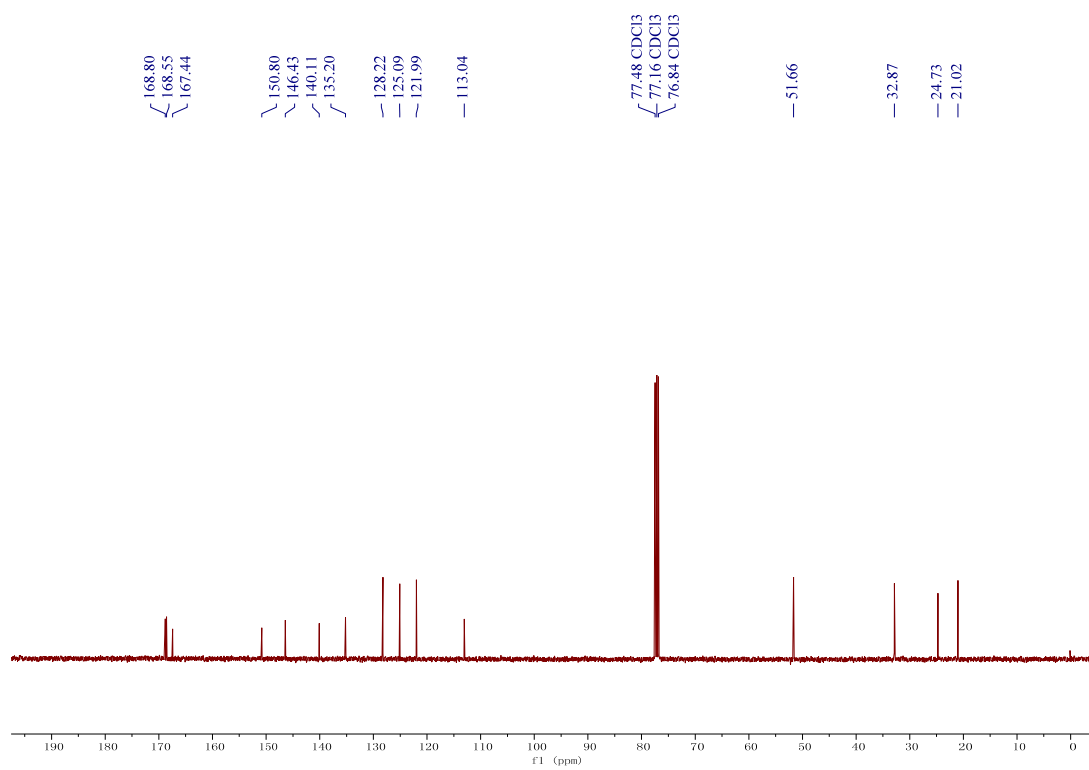

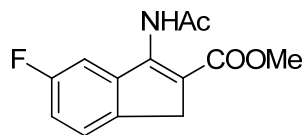

4g

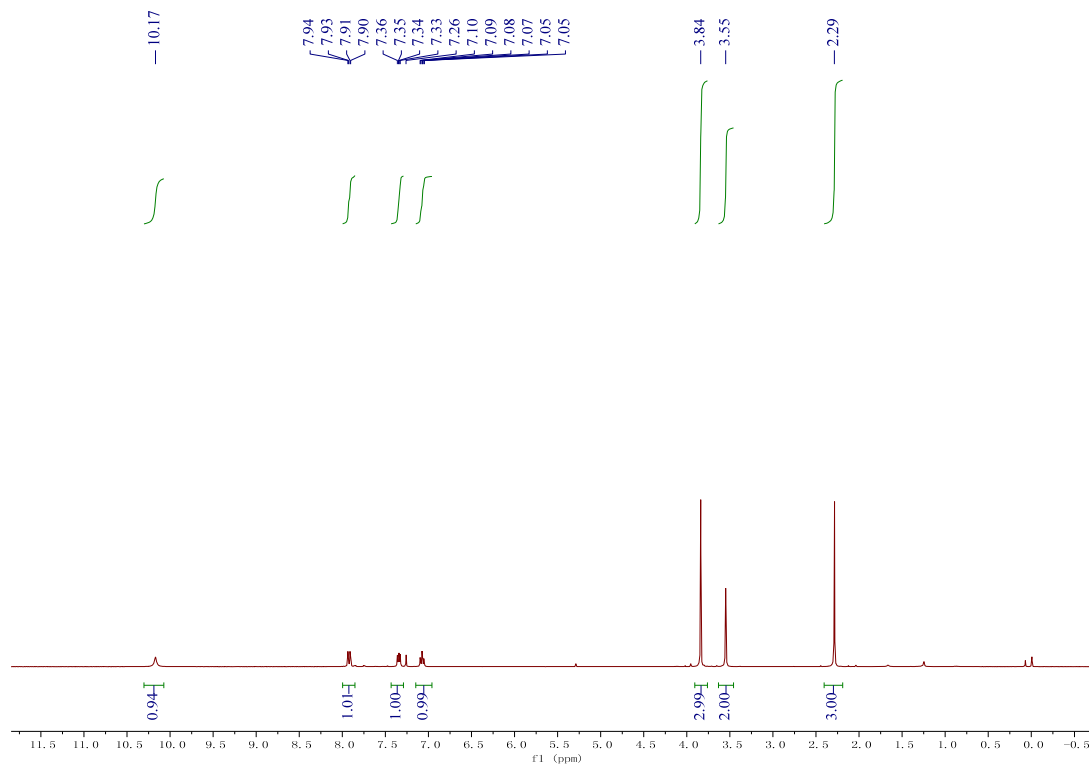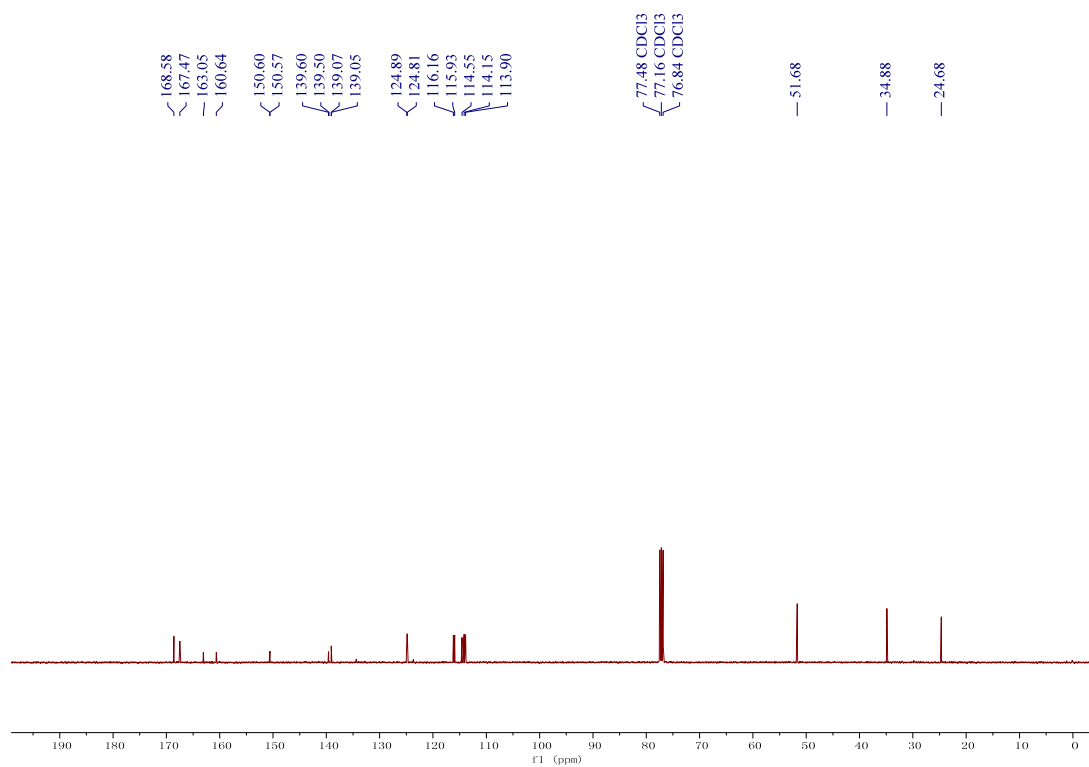

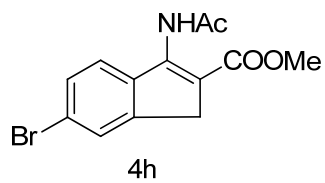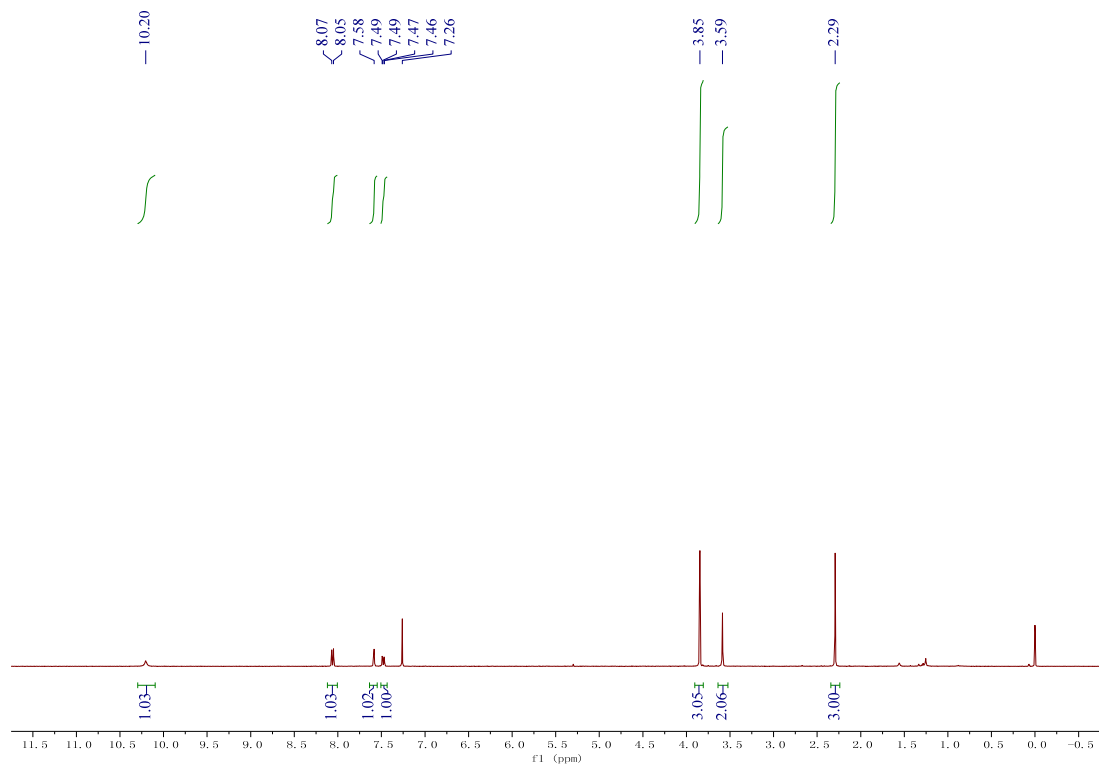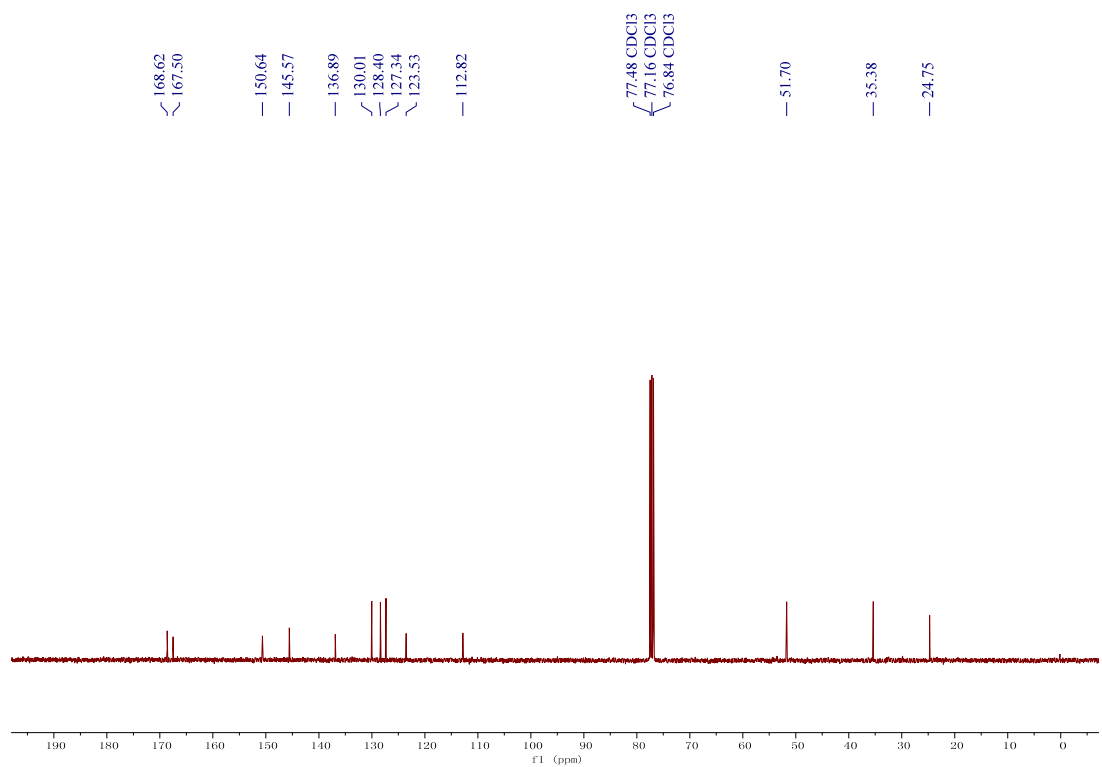

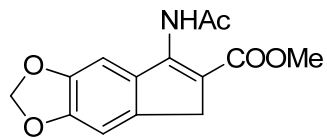

4i

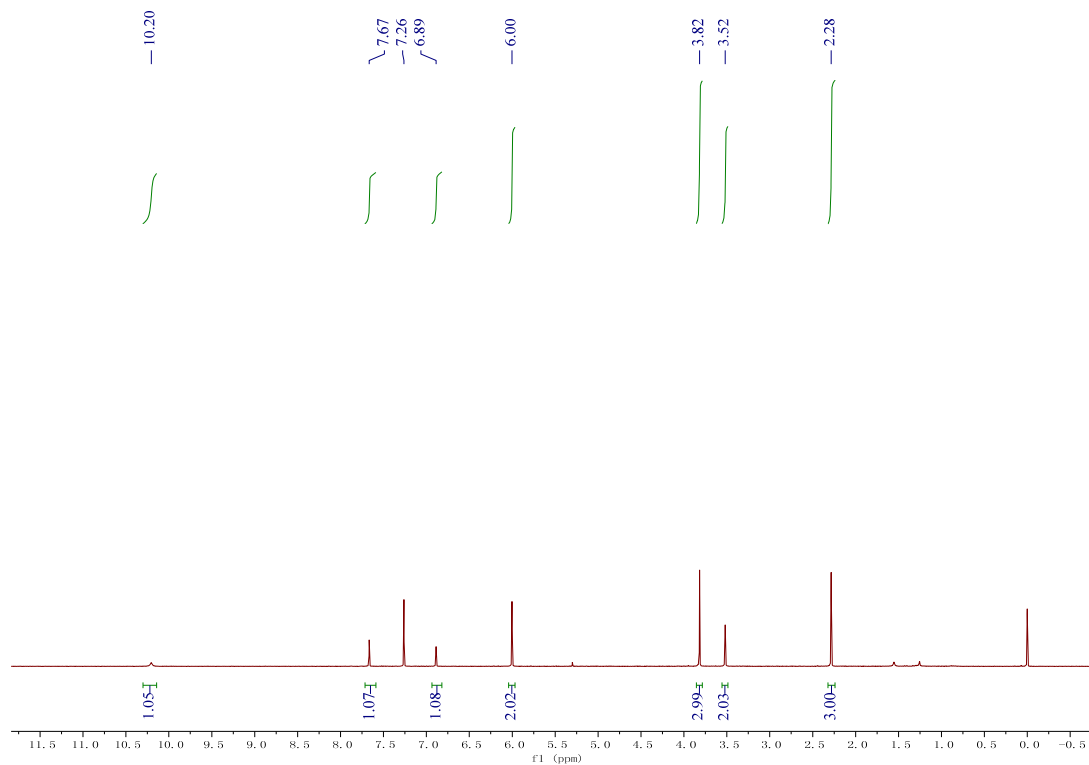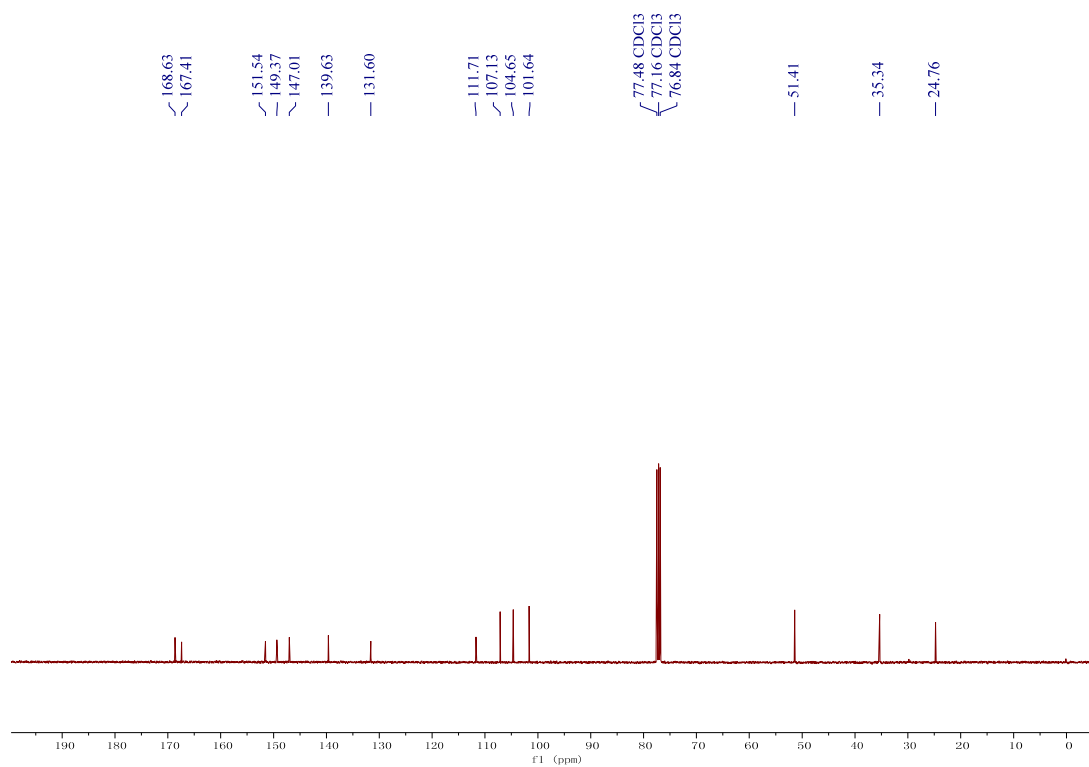

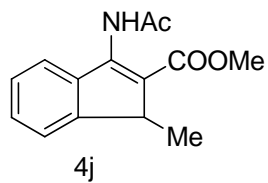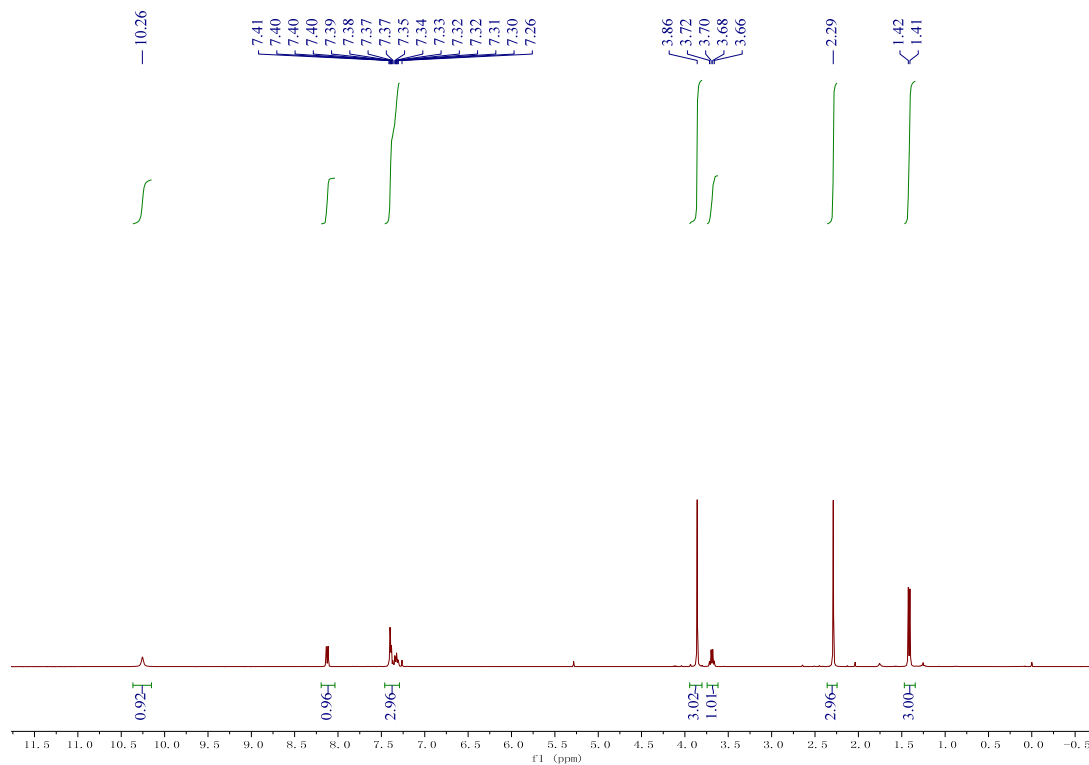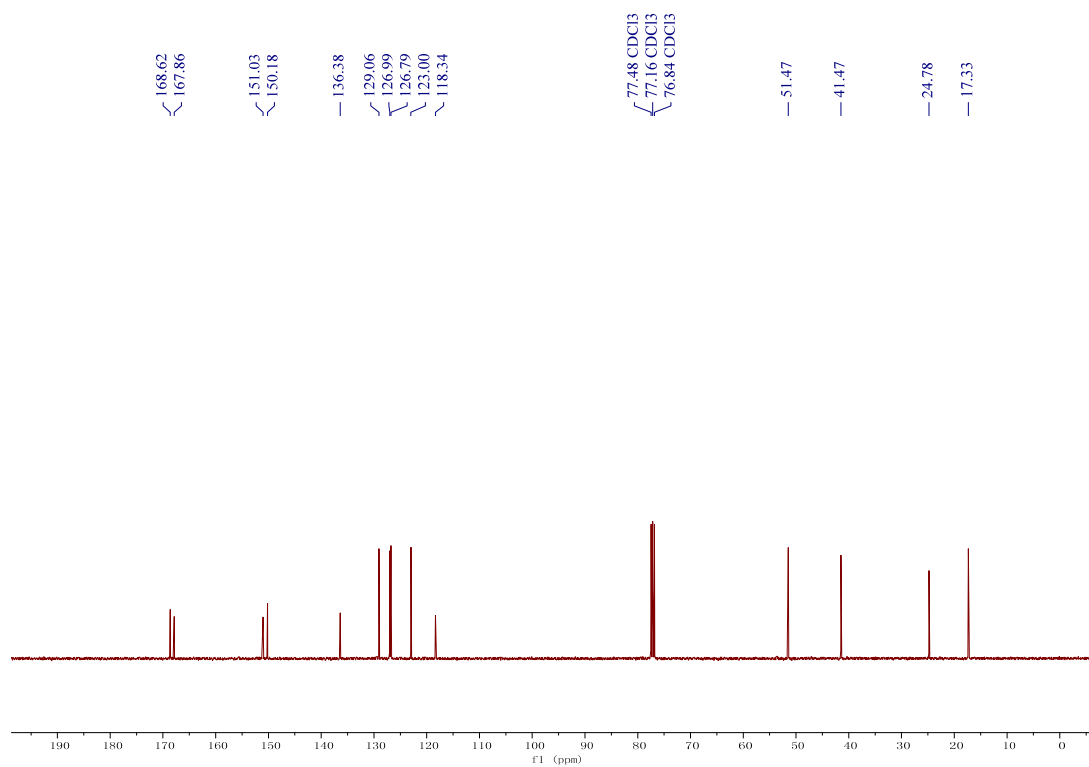

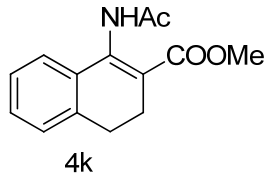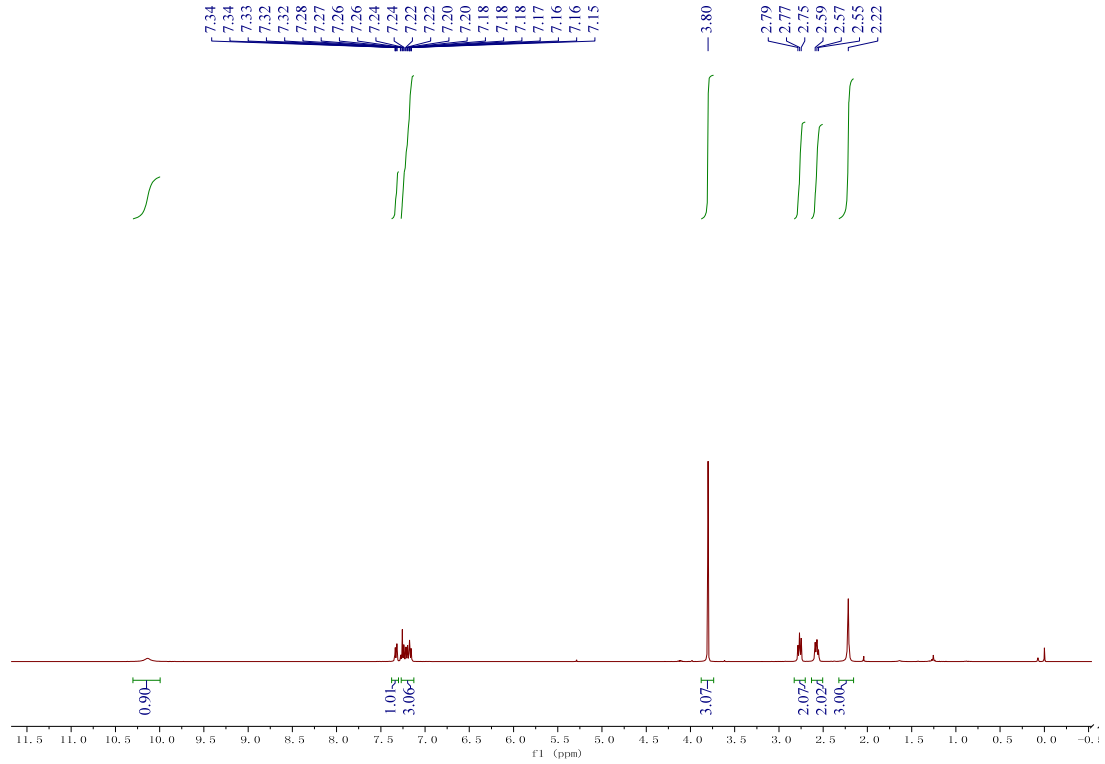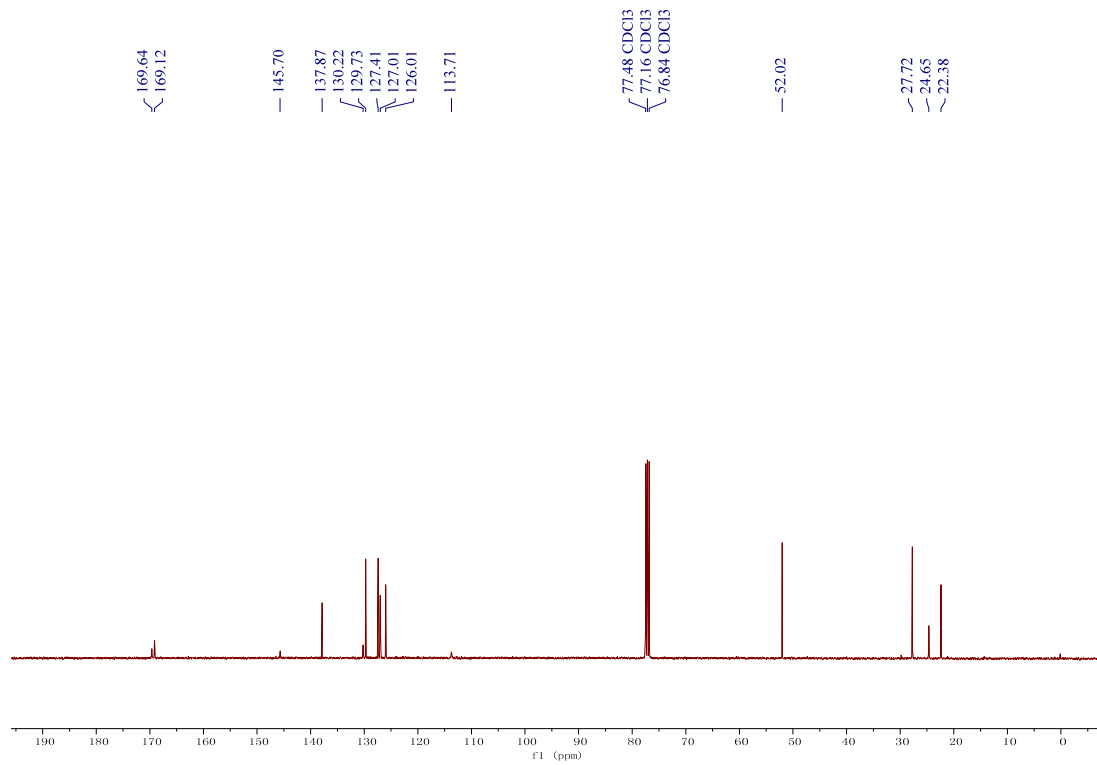

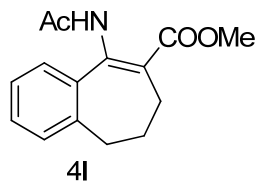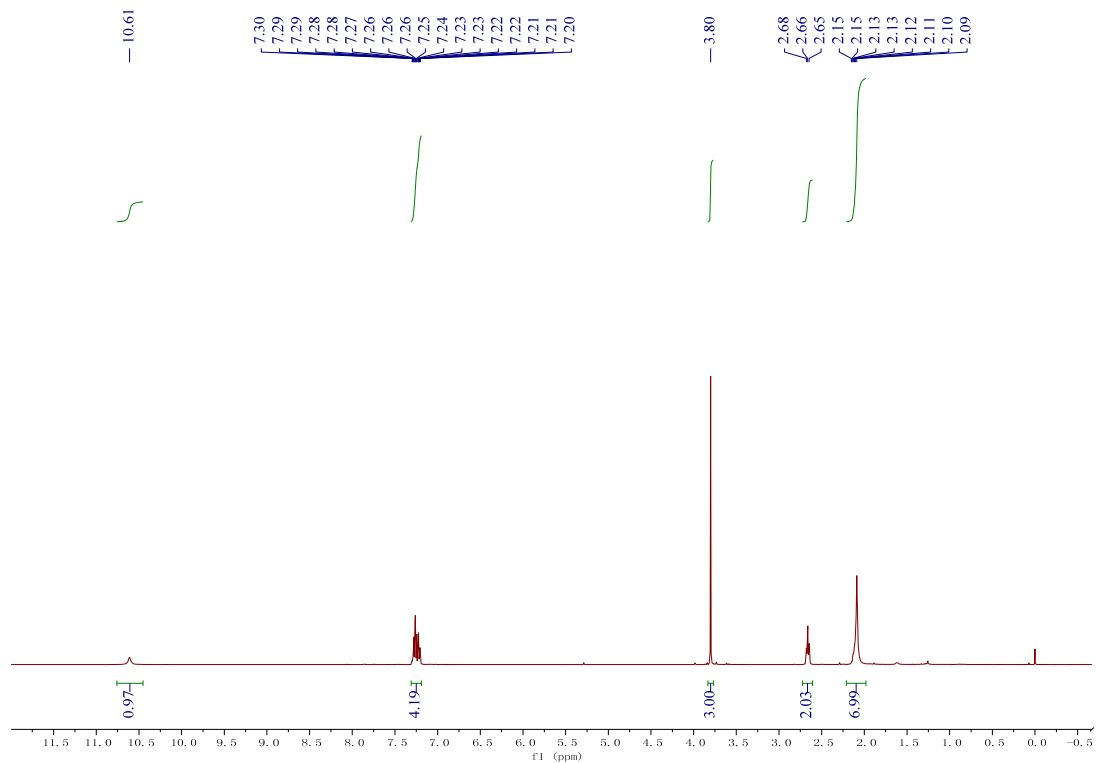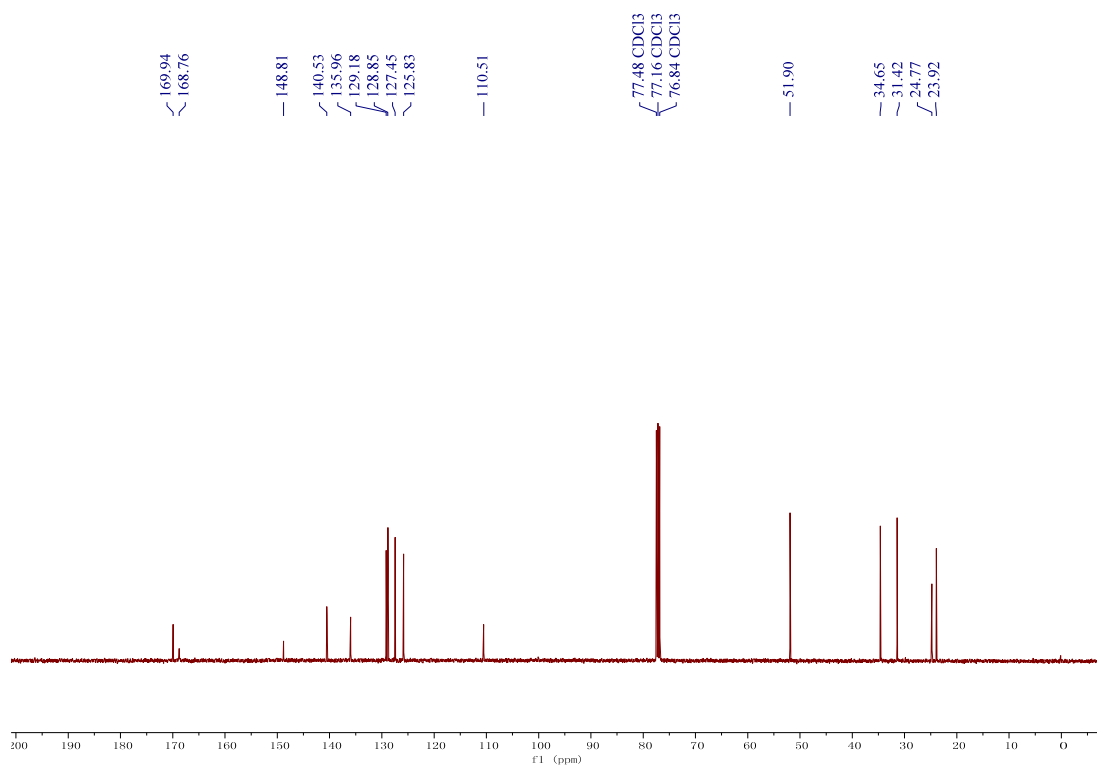

Supplement: c4cc05338a1.pdf [file c4cc05338a1.pdf]
